# Supplementary material
Source: PubMed Central journal article supplement (PMC8462974)

Supporting Information for

## A Photocaged Cell-Permeable Ubiquitin Probe for Temporal Profiling of Deubiquitinating Enzymes

Weijun Gui, Siqi Shen, Zhihao Zhuang\*

Department of Chemistry and Biochemistry, University of Delaware, 214A Drake Hall,

Newark, Delaware, 19716, USA

### Table of Contents

#### Supplemental Figures and Tables

|                                                                                                                                                                                                                 |     |
|-----------------------------------------------------------------------------------------------------------------------------------------------------------------------------------------------------------------|-----|
| <b>Figure S1.</b> ESI-MS characterization of time dependent 365 nm UV irradiation of HA-Cys-Ub-TZ-----                                                                                                          | S3  |
| <b>Figure S2.</b> ESI-MS characterization of USP2-CD incubated with HA-Cys-Ub-TZ without UV irradiation-----                                                                                                    | S4  |
| <b>Figure S3.</b> Nano-flow LC-MS/MS analysis of the labeled USP2-CD by HA-Cys-Ub-TZ probe after trypsin digestion-----                                                                                         | S5  |
| <b>Figure S4.</b> Structure of ubiquitin-based probes-----                                                                                                                                                      | S6  |
| <b>Figure S5.</b> Wild type USP2-CD and USP2-CD mutants labeling by HA-Cys-Ub-TZ -----                                                                                                                          | S7  |
| <b>Figure S6.</b> UCHL3 labeling by 15 $\mu$ M tetrazole probes-----                                                                                                                                            | S8  |
| <b>Figure S7.</b> UCHL1 labeling by 15 $\mu$ M tetrazole probes -----                                                                                                                                           | S9  |
| <b>Figure S8.</b> BSA labeling by 15 $\mu$ M tetrazole probes -----                                                                                                                                             | S10 |
| <b>Figure S9.</b> ESI-MS characterization of HA-Cys-Ub-TZ probe incubated with glutathione upon 365 nm UV irradiation -----                                                                                     | S11 |
| <b>Figure S10.</b> ESI-MS characterization of HA-Cys-Ub-TZ probe incubated with DTT upon 365 nm UV irradiation -----                                                                                            | S12 |
| <b>Figure S11.</b> Wild type USP2-CD labeling by 15 $\mu$ M HA-Cys-Ub-TZ in the presence of different concentrations of DTT-----                                                                                | S13 |
| <b>Figure S12.</b> USP2-CD and UCHL3 labeling by different concentrations of HA-Cys-Ub-TZ-----                                                                                                                  | S14 |
| <b>Figure S13:</b> Heat map representing the LFQ intensity scores of significantly enriched protein groups other than DUBs by 15 $\mu$ M HA-Cys(cR <sub>10</sub> )-Ub-TZ upon 365 nm UV irradiation-----        | S15 |
| <b>Figure S14:</b> Volcano plot of protein groups pulled down in the absence of UV irradiation with 15 $\mu$ M HA-Cys(cR <sub>10</sub> )-Ub-TZ treatment versus control pulldown without probe -----            | S16 |
| <b>Figure S15:</b> Expression levels of cyclin A and GAPDH in synchronized HeLa cells -----                                                                                                                     | S17 |
| <b>Figure S16:</b> Volcano plot of pairwise comparison of protein groups pulled down in G1/S phase by 15 $\mu$ M HA-Cys(cR <sub>10</sub> )-Ub-TZ with 365 nm UV irradiation relative to no UV irradiation ----- | S18 |

|                                                                                                                                                                                                                                                   |         |
|---------------------------------------------------------------------------------------------------------------------------------------------------------------------------------------------------------------------------------------------------|---------|
| <b>Figure S17:</b> Heat map representing the LFQ intensity scores of G1/S phase DUBs significantly enriched by 15 $\mu$ M HA-Cys(cR <sub>10</sub> )-Ub-TZ upon 365 nm UV irradiation -----                                                        | S19     |
| <b>Figure S18:</b> Volcano plot of pairwise comparison of protein groups pulled down in G2/M phase by HA-Cys(cR <sub>10</sub> )-Ub-TZ with 365 nm UV irradiation relative to no UV irradiation -----                                              | S20     |
| <b>Figure S19:</b> Heat map representing the LFQ intensity scores of G2/M phase DUBs significantly enriched by 15 $\mu$ M HA-Cys(cR <sub>10</sub> )-Ub-TZ upon 365 nm UV irradiation-----                                                         | S21     |
| <b>Figure S20:</b> Intracellular proteome-wide DUB profiling by 15 $\mu$ M HA-Cys(cR <sub>10</sub> )-Ub-TZ with 365 nm UV irradiation comparing DUBs captured in different phases of cell cycle of HeLa cells and unsynchronized cells-----       | S22     |
| <b>Table S1.</b> LFQ intensity scores for DUBs captured in HeLa cell using 15 $\mu$ M HA-Cys(cR <sub>10</sub> )-Ub-TZ -                                                                                                                           | S23     |
| <b>Table S2.</b> LFQ intensity scores for proteins other than DUBs significantly enriched in HeLa cell using 15 $\mu$ M HA-Cys(cR <sub>10</sub> )-Ub-TZ -----                                                                                     | S24     |
| <b>Table S3.</b> Pairwise comparison of fold difference and <i>P</i> -value ( $-\log_{10}$ ) for DUBs captured in HeLa cells at different time points following the release from G1/S phase using 15 $\mu$ M HA-Cys(cR <sub>10</sub> )-Ub-TZ. --- | S25     |
| <b>Supplemental Methods</b> -----                                                                                                                                                                                                                 | S26-S28 |
| <b>General Information</b> -----                                                                                                                                                                                                                  | S29     |
| <b>Experimental Procedures and Characterization Data</b> -----                                                                                                                                                                                    | S30     |
| <b>Scheme S1.</b> Synthesis of (2-(1-methyl-1H-pyrrol-2-yl)-2H-tetrazol-5-yl)methanamine ( <b>5</b> )-----                                                                                                                                        | S30-S31 |
| <b>Scheme S2.</b> Generation of HA-Cys(cR <sub>10</sub> )-Ub-TZ-----                                                                                                                                                                              | S32-S33 |
| <b>References</b> -----                                                                                                                                                                                                                           | S34     |
| <b><sup>1</sup>H and <sup>13</sup>C NMR Spectra</b> -----                                                                                                                                                                                         | S35-S38 |

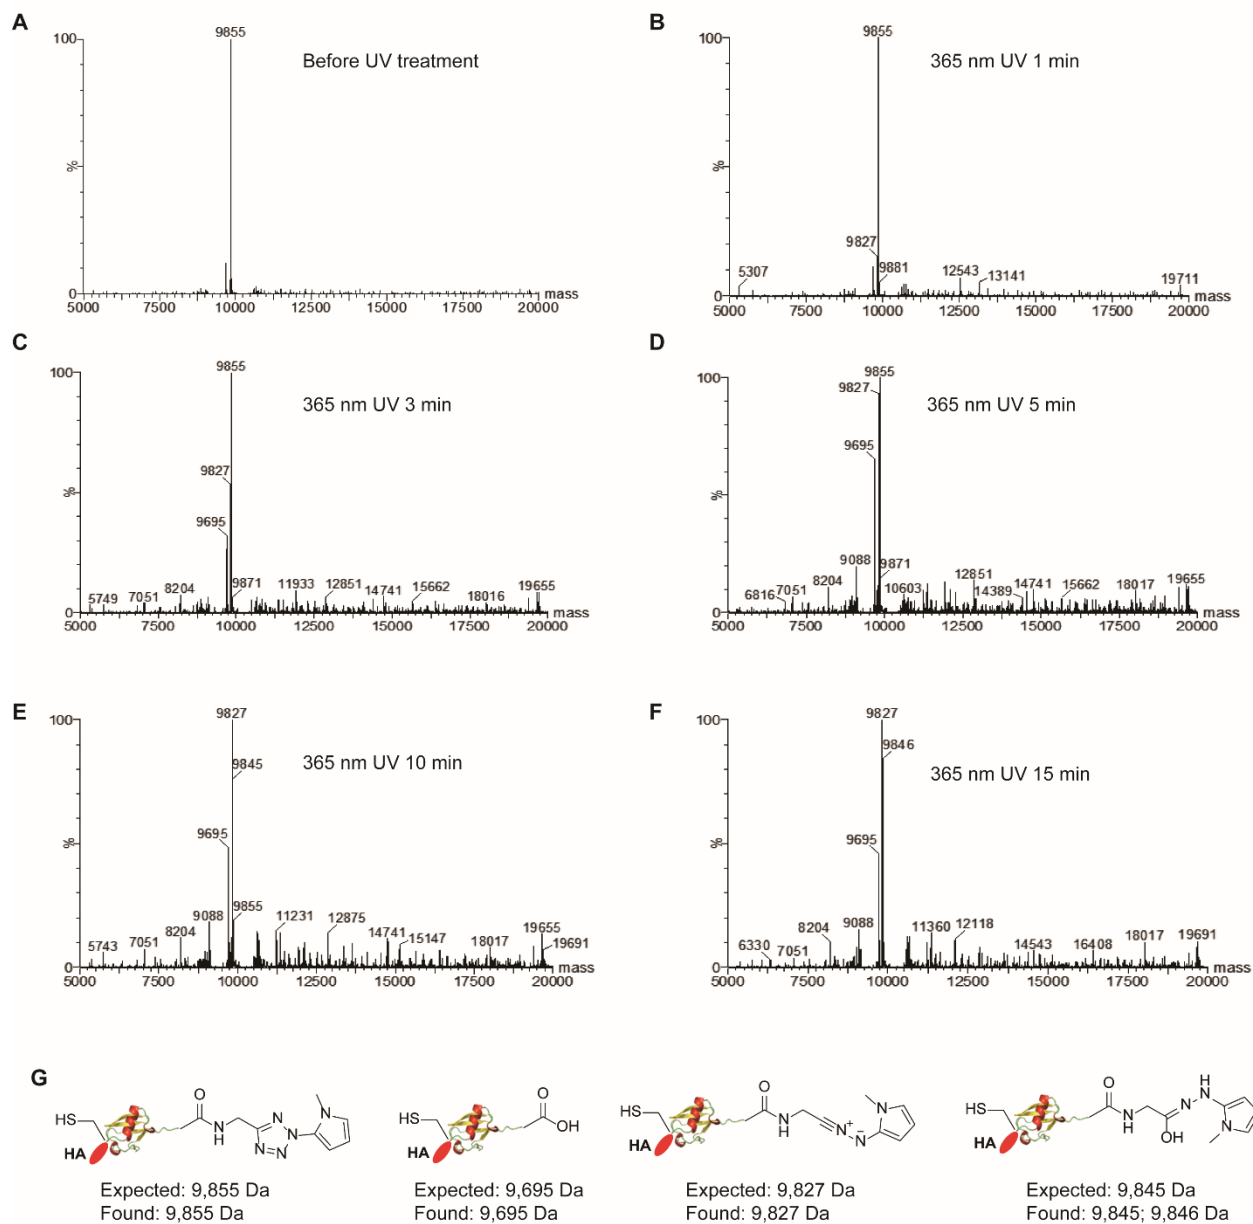

**Figure S1.** ESI-MS characterization of time dependent 365 nm UV irradiation of HA-Cys-Ub-TZ. A) ESI-MS characterization of 15  $\mu$ M HA-Cys-Ub-TZ before UV irradiation; B-F) ESI-MS characterization of 15  $\mu$ M HA-Cys-Ub-TZ UV irradiated at 365 nm for 1, 3, 5, 10, 15 mins, respectively; G) Assignment of the major peaks found in the ESI-MS spectrometry.

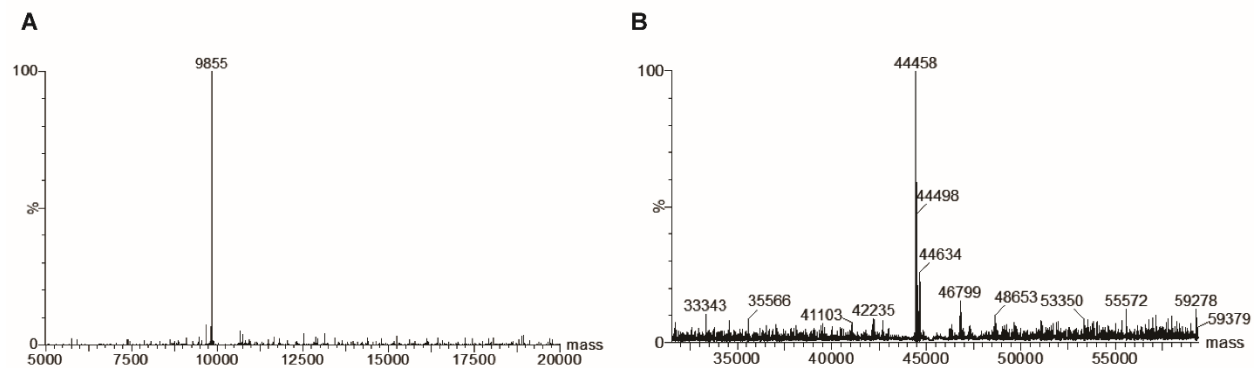

**Figure S2.** ESI-MS characterization of HA-Cys-Ub-TZ and HA-Cys-Ub-TZ incubated with USP2-CD without UV irradiation. A) ESI-MS characterization of HA-Cys-Ub-TZ; B) ESI-MS characterization of USP2-CD incubated with HA-Cys-Ub-TZ without UV irradiation.

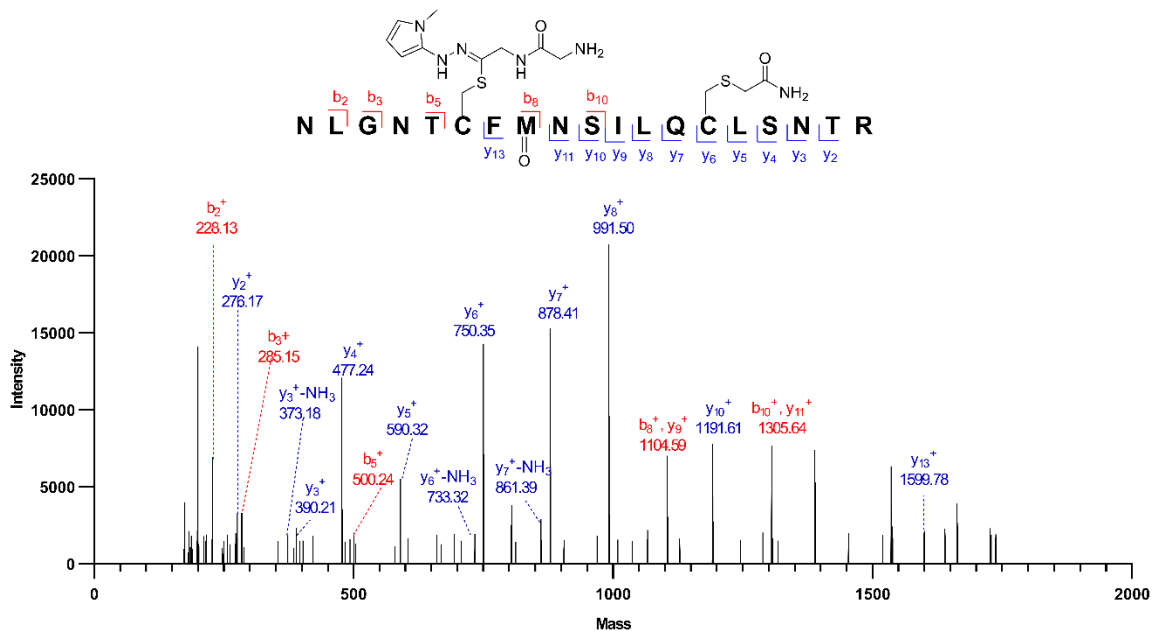

**Figure S3.** Nano-flow LC-MS/MS analysis of the labeled USP2-CD by HA-Cys-Ub-TZ probe after trypsin digestion. High-energy collision dissociation MS2 spectrum showing the identification of active site cysteine on USP2-CD modification by tetrazole probe peptide fragment.

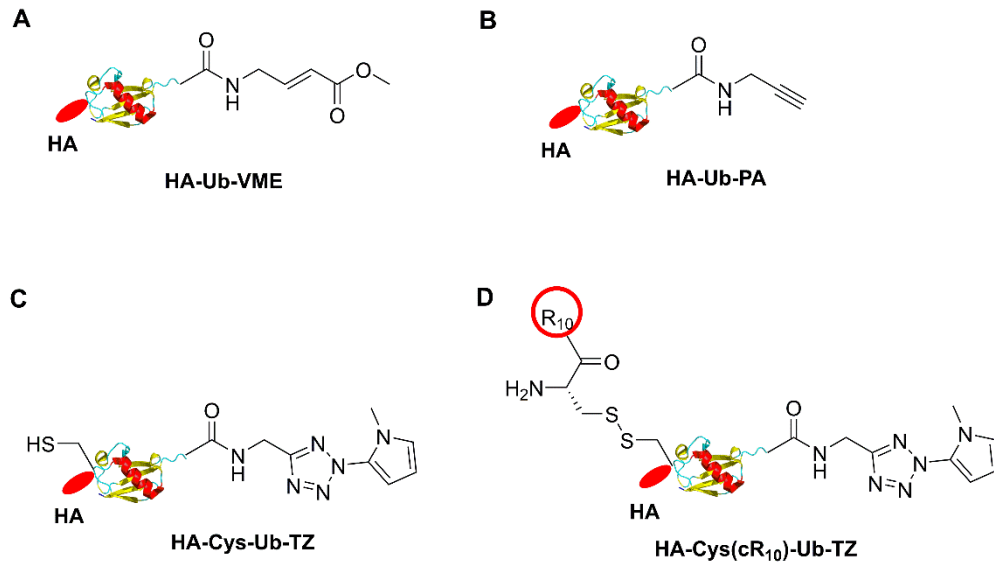

**Figure S4.** Structure of ubiquitin-based probes. A) Structure of probe HA-Ub-VME; B) Structure of probe HA-Ub-PA; C) Structure of probe HA-Cys-Ub-TZ; D) Structure of probe HA-Cys(cR<sub>10</sub>)-Ub-TZ.

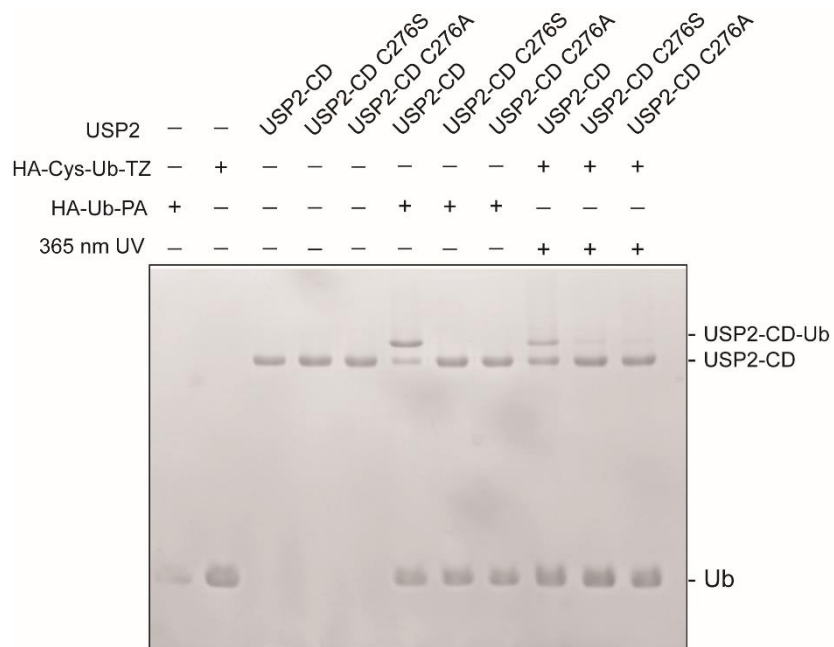

**Figure S5.** Wild-type USP2-CD and USP2-CD mutants labeling by 15  $\mu$ M HA-Cys-Ub-TZ, analyzed using 20% SDS-PAGE gel and stained with Coomassie brilliant blue. HA-Ub-PA probe was used for a comparison.

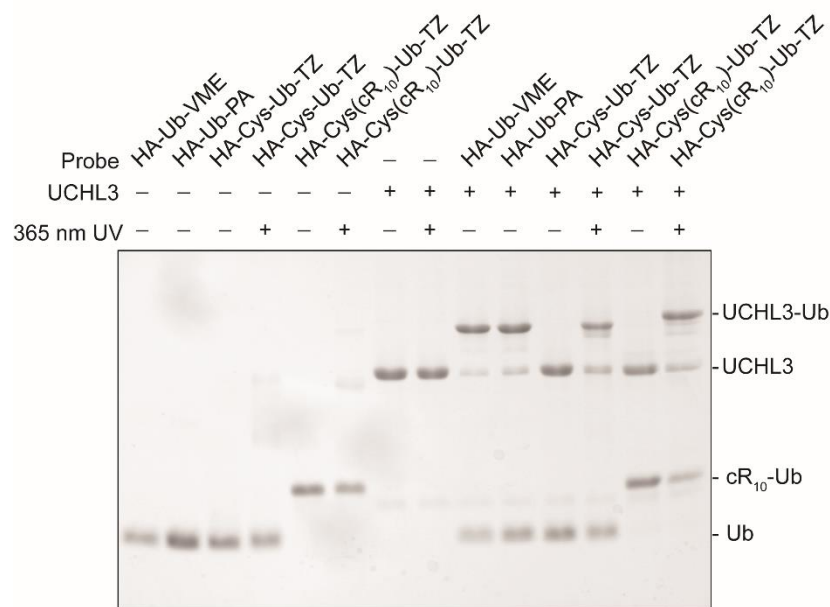

**Figure S6.** UCHL3 labeling by 15  $\mu$ M Ub-TZ probes, analyzed using 20% SDS-PAGE gel and stained with Coomassie brilliant blue. HA-Ub-VME and HA-Ub-PA were used as a comparison.



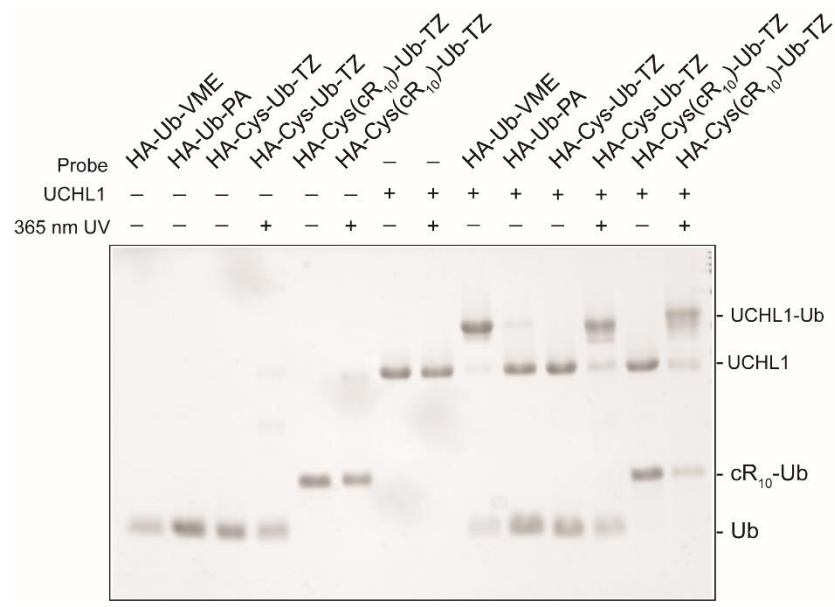

**Figure S7.** UCHL1 labeling by 15  $\mu$ M Ub-TZ probes, analyzed using 20% SDS-PAGE gel and stained with Coomassie brilliant blue. HA-Ub-VME and HA-Ub-PA were used as a comparison.

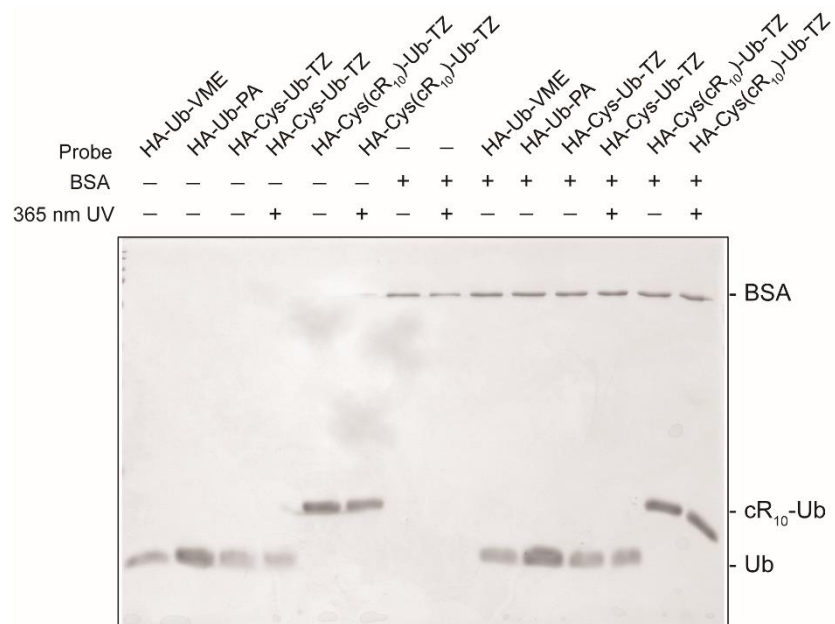

**Figure S8.** BSA labeling by 15  $\mu$ M Ub-TZ probes, analyzed using 20% SDS-PAGE gel and stained with Coomassie brilliant blue. HA-Ub-PA and HA-Ub-VME were used as comparison.

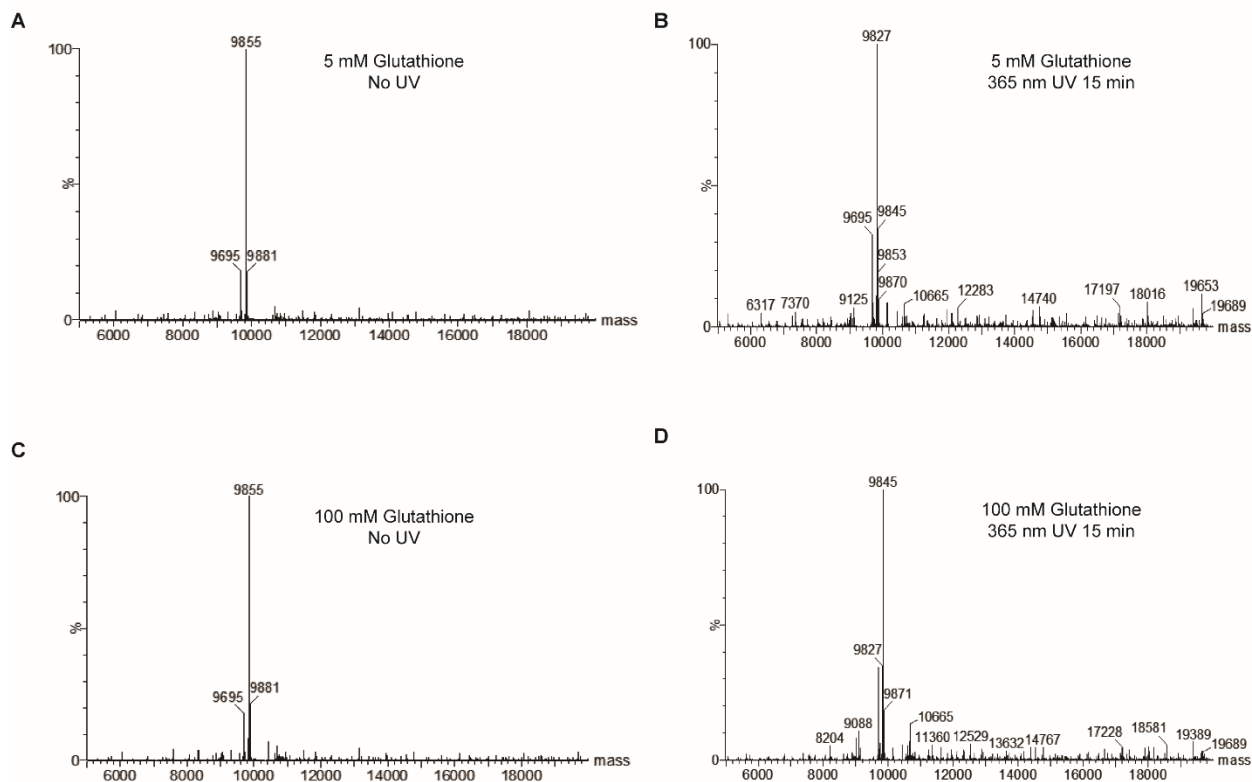

**Figure S9.** ESI-MS characterization of HA-Cys-Ub-TZ probe incubated with glutathione upon 365 nm UV irradiation. A) ESI-MS characterization of 15  $\mu$ M HA-Cys-Ub-TZ incubated with 5 mM glutathione without UV irradiation; B) ESI-MS characterization of 15  $\mu$ M HA-Cys-Ub-TZ incubated with 5 mM glutathione with 365 nm UV irradiation for 15 min; C) ESI-MS characterization of 15  $\mu$ M HA-Cys-Ub-TZ incubated with 100 mM glutathione without UV irradiation; D) ESI-MS characterization of 15  $\mu$ M HA-Cys-Ub-TZ incubated with 100 mM glutathione with 365 nm UV irradiation for 15 min. 9,827 Da corresponds to the nitrilimine intermediate HA-Cys-Ub-NM and 9,845 Da corresponds to the hydroxylation product of nitrilimine (HA-Cys-Ub-NM-OH).

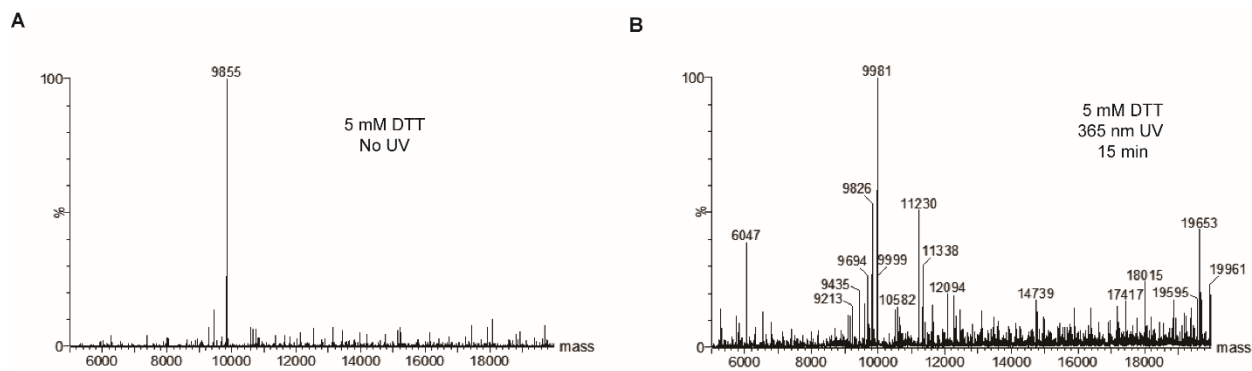

**Figure S10.** ESI-MS characterization of HA-Cys-Ub-TZ probe incubated with DTT upon 365 nm UV irradiation. A) ESI-MS characterization of 15  $\mu$ M HA-Cys-Ub-TZ incubated with 5 mM DTT without UV irradiation; B) ESI-MS characterization of 15  $\mu$ M HA-Cys-Ub-TZ incubated with 5 mM DTT with 365 nm UV irradiation for 15 min. The major peak 9,981 Da agrees with the expected mass of HA-Cys-Ub-NM-DTT.

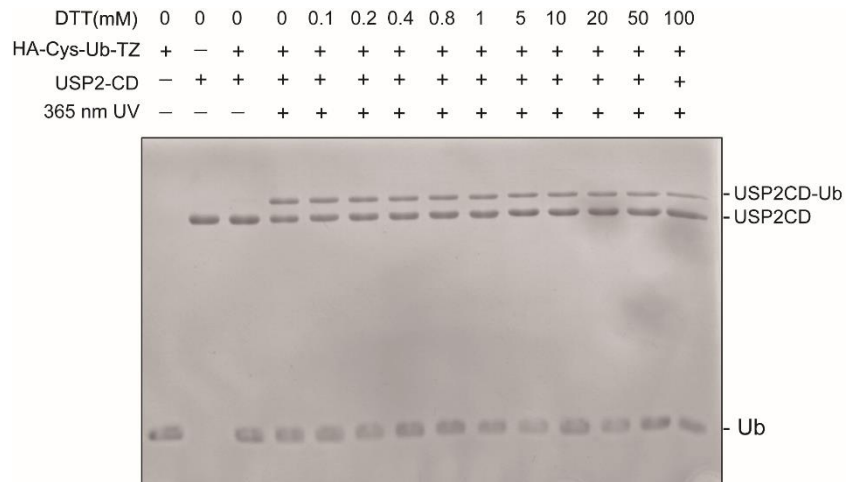

**Figure S11.** Wild type USP2-CD labeling by 15  $\mu$ M HA-Cys-Ub-TZ in the presence of different concentrations of DTT. The labeling product was analyzed using 20% SDS-PAGE gel and stained with Coomassie brilliant blue.

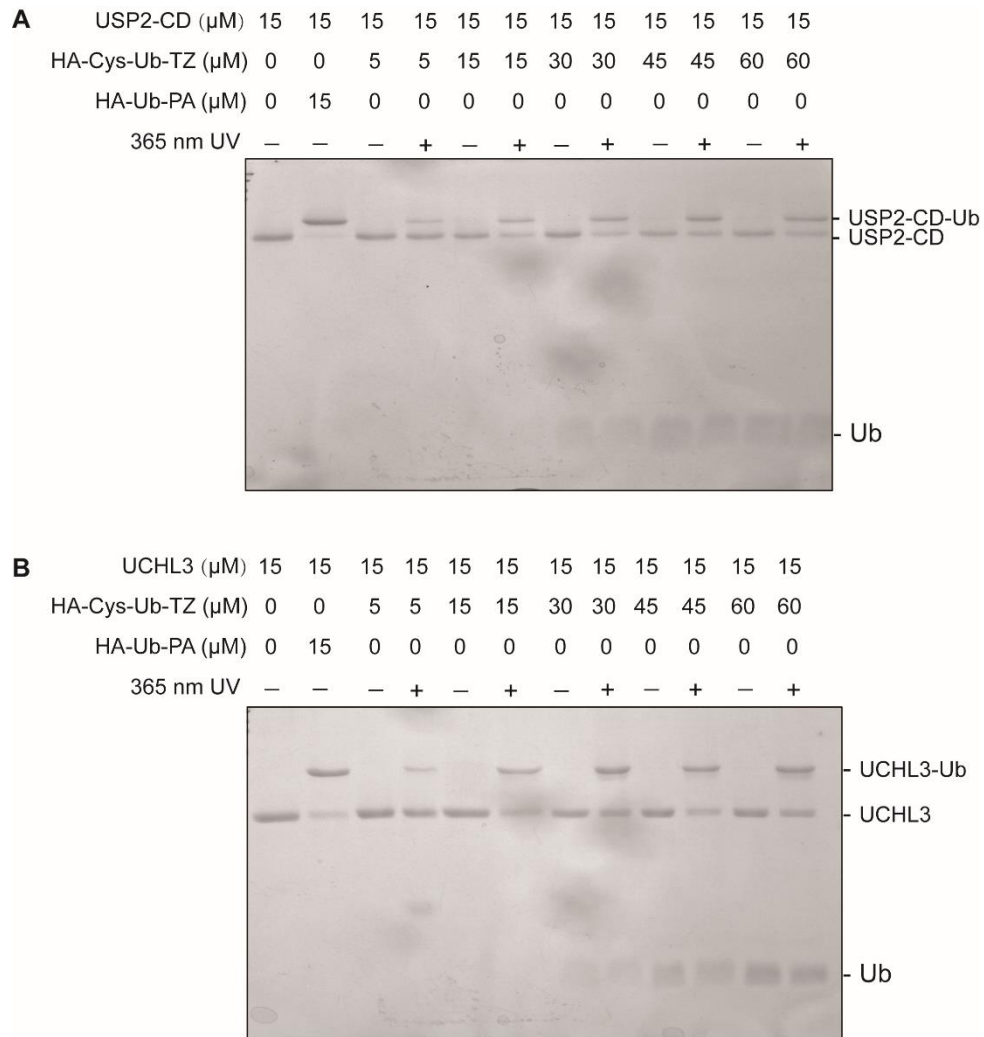

**Figure S12.** USP2-CD and UCHL3 labeling by different concentrations of HA-Cys-Ub-TZ. A) USP2-CD labeling by different concentration of HA-Cys-Ub-TZ; B) UCHL3 labeling by different concentration of HA-Cys-Ub-TZ. HA-Ub-PA was used as a control probe.

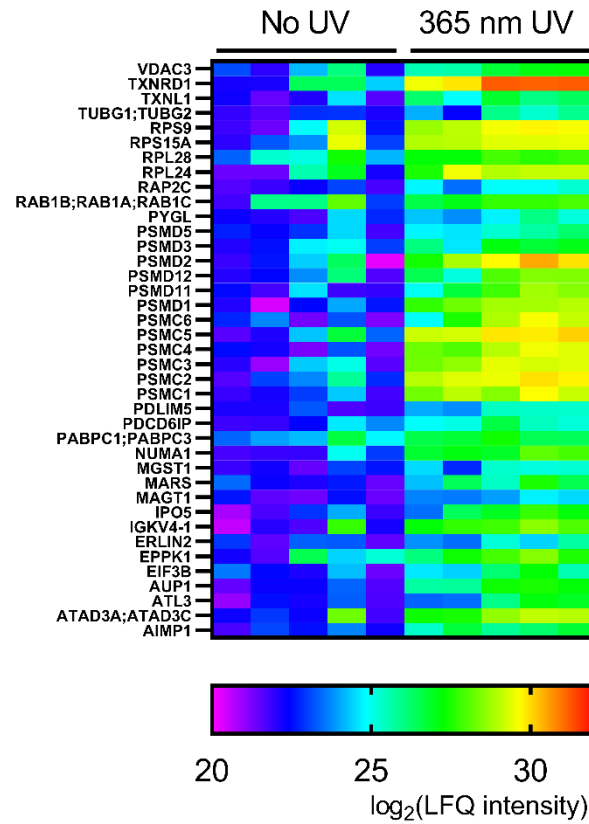

**Figure S13:** Heat map representing the LFQ intensity scores of significantly enriched protein groups other than DUBs by 15  $\mu$ M HA-Cys(cR<sub>10</sub>)-Ub-TZ upon 365 nm UV irradiation. Red represents enrichment (higher LFQ intensity (log<sub>2</sub>)), where lack of enrichment (lower LFQ intensity (log<sub>2</sub>)) is shown in purple.

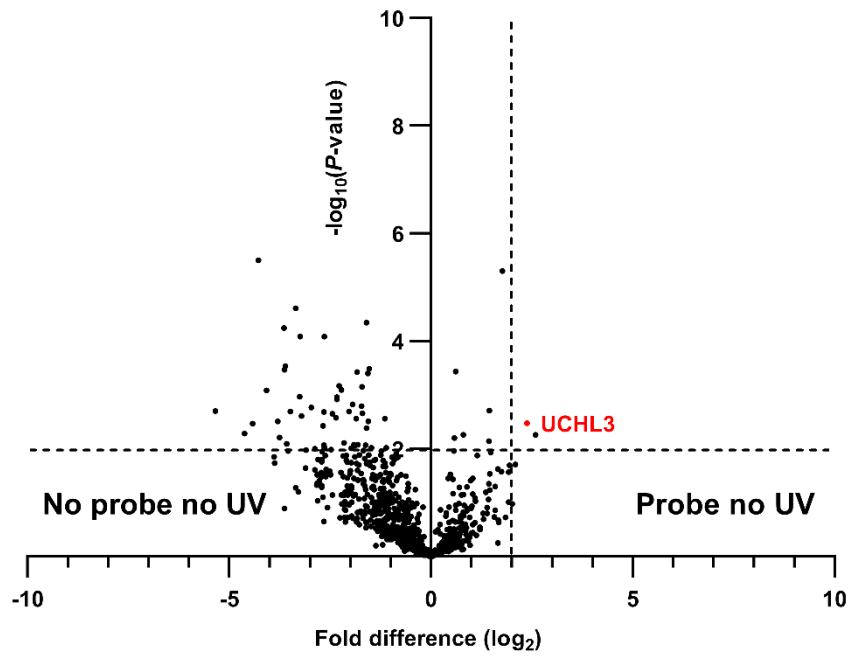

**Figure S14:** Volcano plot of protein groups pulled down in the absence of UV irradiation with 15  $\mu$ M HA-Cys(cR<sub>10</sub>)-Ub-TZ treatment versus control pulldown without probe. Significantly enriched DUB is colored and labeled as red.



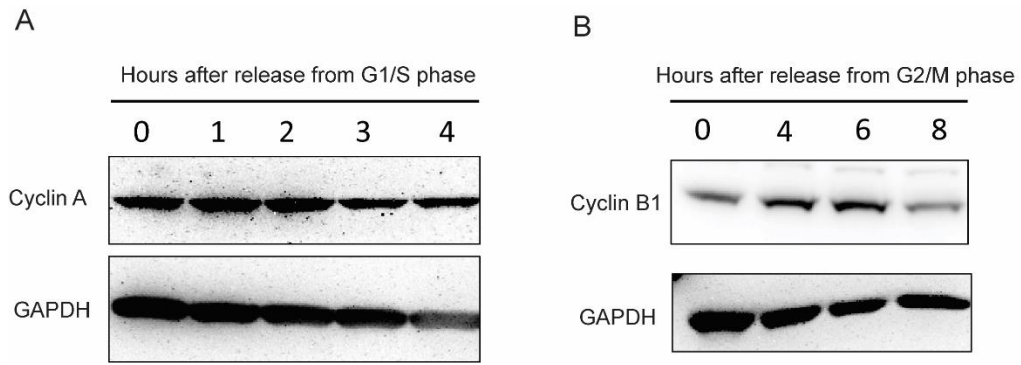

**Figure S15:** A) Expression levels of cyclin A and GAPDH in synchronized HeLa cells at indicated time points after release from G1/S phase block. B) Expression levels of cyclin B1 and GAPDH in synchronized HeLa cells at indicated time points after release from G2/M phase block.

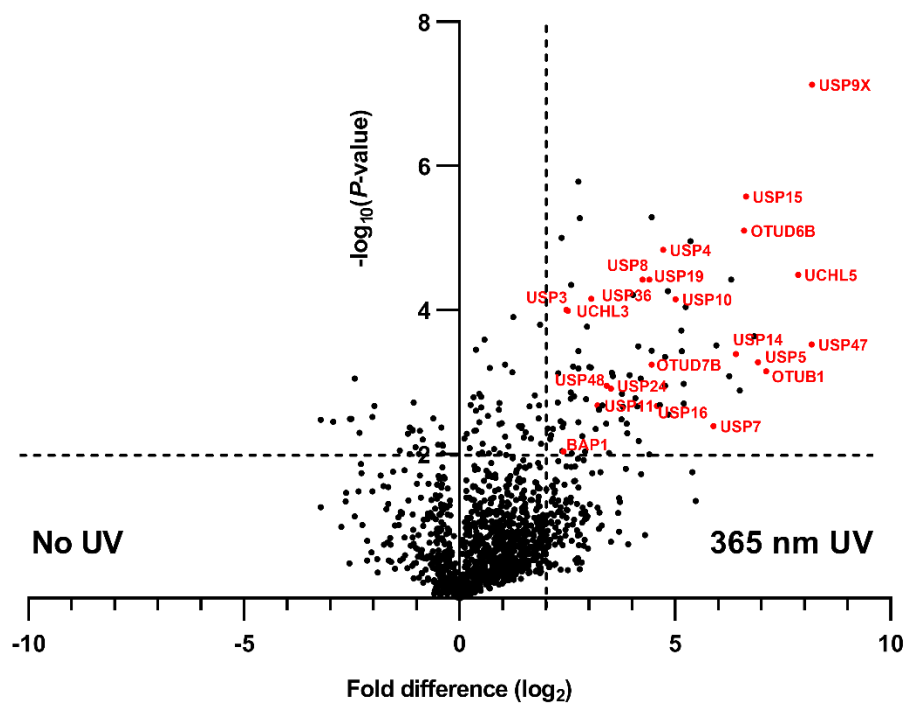

**Figure S16:** Volcano plot of pairwise comparison of protein groups pulled down in G1/S phase by 15  $\mu$ M HA-Cys(cR<sub>10</sub>)-Ub-TZ with 365 nm UV irradiation relative to no UV irradiation. Significantly enriched DUBs are colored and labeled as red.

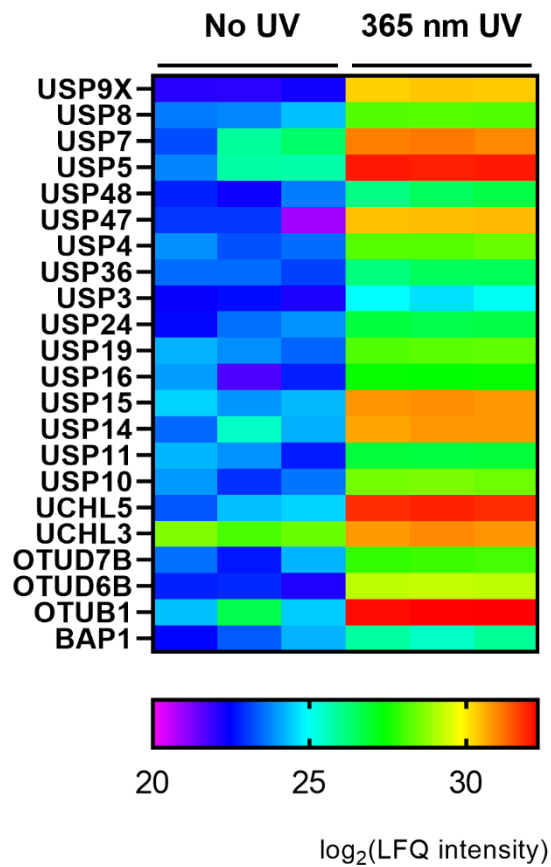

**Figure S17:** Heat map representing the LFQ intensity scores of G1/S phase DUBs significantly enriched by 15  $\mu$ M HA-Cys(cR<sub>10</sub>)-Ub-TZ upon 365 nm UV irradiation. Red represents enrichment (higher LFQ intensity (log<sub>2</sub>)), where lack of enrichment (lower LFQ intensity (log<sub>2</sub>)) is shown in purple.

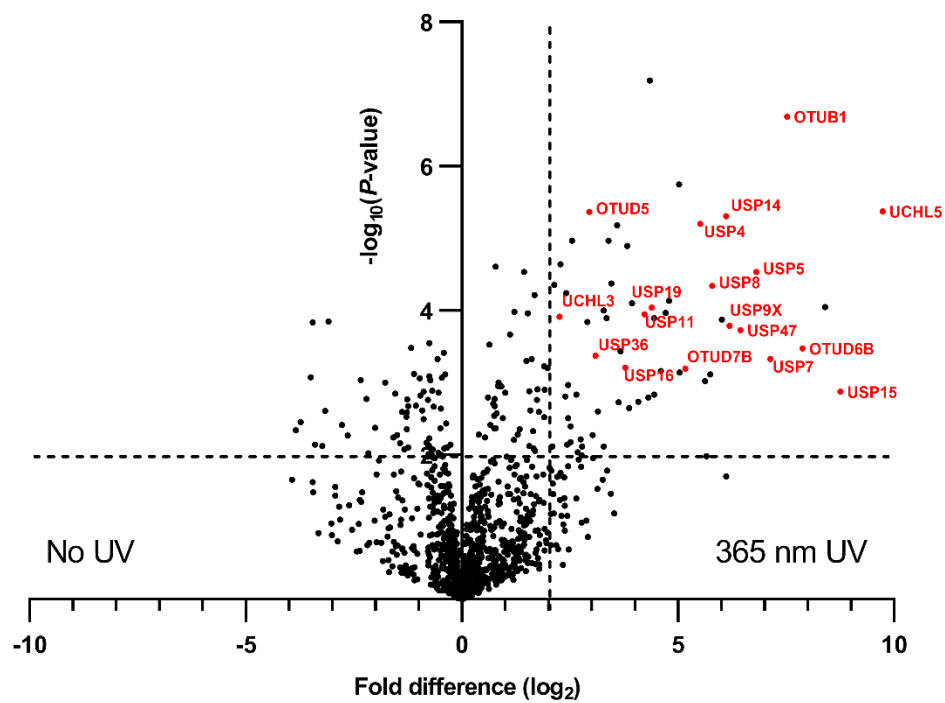

**Figure S18:** Volcano plot of pairwise comparison of protein groups pulled down in G2/M phase by HA-Cys(cR<sub>10</sub>)-Ub-TZ with 365 nm UV irradiation relative to no UV irradiation. Significantly enriched DUBs are colored and labeled as red.

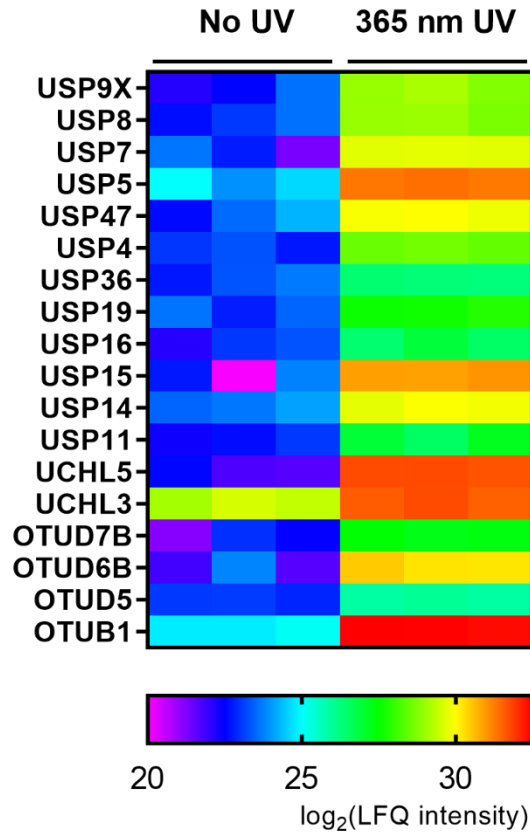

**Figure S19:** Heat map representing the LFQ intensity scores of G2/M phase DUBs significantly enriched by 15  $\mu$ M HA-Cys(cR<sub>10</sub>)-Ub-TZ upon 365 nm UV irradiation. Red represents enrichment (higher LFQ intensity ( $\log_2$ )), where lack of enrichment (lower LFQ intensity ( $\log_2$ )) is shown in purple.

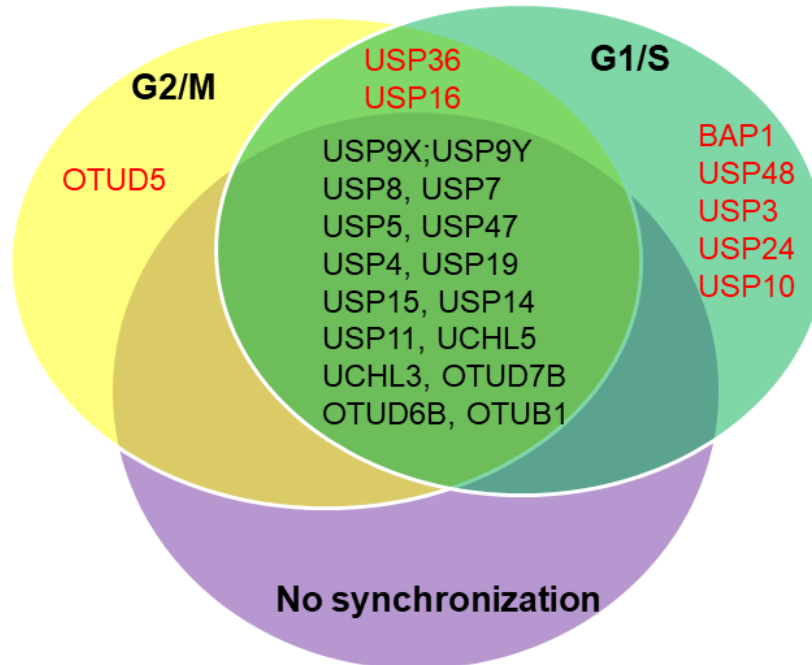

**Figure S20:** Intracellular proteome-wide DUB profiling by 15  $\mu$ M HA-Cys(cR<sub>10</sub>)-Ub-TZ with 365 nm UV irradiation comparing DUBs captured in different phases of cell cycle of HeLa cells and unsynchronized cells.

**Table S1.** LFQ intensity scores for DUBs captured in HeLa cell using 15  $\mu$ M HA-Cys(cR<sub>10</sub>)-Ub-TZ.

| Gene Name          | No UV   |         |         |         |         | 365 nm UV |         |         |         |         |
|--------------------|---------|---------|---------|---------|---------|-----------|---------|---------|---------|---------|
|                    | 1       | 2       | 3       | 4       | 5       | 1         | 2       | 3       | 4       | 5       |
| <b>USP9X;USP9Y</b> | NaN     | NaN     | NaN     | NaN     | NaN     | 28.3315   | 28.7999 | 28.8674 | 28.0177 | 27.8655 |
| <b>USP8</b>        | NaN     | NaN     | NaN     | NaN     | NaN     | 27.5821   | 27.9135 | 28.0068 | 24.8527 | 24.4727 |
| <b>USP7</b>        | NaN     | NaN     | NaN     | NaN     | NaN     | 29.0685   | 29.0024 | 29.1896 | 28.6109 | 28.7265 |
| <b>USP5</b>        | 20.2356 | 22.126  | NaN     | 23.0551 | NaN     | 31.3299   | 31.8014 | 31.5739 | 29.9474 | 30.1598 |
| <b>USP48</b>       | NaN     | NaN     | NaN     | NaN     | NaN     | 23.6241   | 25.0739 | NaN     | NaN     | NaN     |
| <b>USP47</b>       | NaN     | NaN     | NaN     | NaN     | NaN     | 28.8619   | 29.2001 | 29.059  | 27.6968 | 28.7979 |
| <b>USP4</b>        | NaN     | NaN     | NaN     | NaN     | NaN     | 28.0277   | 28.2591 | 27.813  | 24.6895 | 25.326  |
| <b>USP36</b>       | NaN     | NaN     | NaN     | NaN     | NaN     | 24.413    | 26.8809 | 25.8991 | NaN     | NaN     |
| <b>USP32</b>       | NaN     | NaN     | NaN     | NaN     | NaN     | 22.6995   | NaN     | NaN     | NaN     | NaN     |
| <b>USP3</b>        | NaN     | NaN     | NaN     | NaN     | NaN     | NaN       | 25.4547 | NaN     | NaN     | NaN     |
| <b>USP24</b>       | NaN     | NaN     | NaN     | NaN     | NaN     | 24.5104   | 24.5575 | 24.4334 | NaN     | NaN     |
| <b>USP19</b>       | NaN     | NaN     | NaN     | NaN     | NaN     | 27.8889   | 27.9596 | 27.6817 | 26.1838 | 26.9584 |
| <b>USP16</b>       | NaN     | NaN     | NaN     | NaN     | NaN     | 26.3284   | 26.8476 | 26.107  | NaN     | 25.837  |
| <b>USP15</b>       | NaN     | NaN     | NaN     | NaN     | NaN     | 30.5241   | 30.8309 | 30.71   | 29.1151 | 29.5596 |
| <b>USP14</b>       | NaN     | NaN     | NaN     | 21.3546 | 22.5708 | 30.189    | 30.3644 | 30.2598 | 29.1904 | 29.4062 |
| <b>USP11</b>       | NaN     | NaN     | NaN     | NaN     | NaN     | 27.545    | 27.5541 | 27.488  | NaN     | NaN     |
| <b>USP10</b>       | NaN     | NaN     | NaN     | NaN     | NaN     | 24.8332   | 25.2595 | 27.0565 | 24.2849 | NaN     |
| <b>UCHL5</b>       | NaN     | NaN     | NaN     | NaN     | NaN     | 30.5535   | 30.5978 | 31.2686 | 31.3588 | 31.2413 |
| <b>UCHL3</b>       | 25.0648 | 25.6011 | 25.7311 | 26.1971 | 24.7534 | 30.6053   | 30.6175 | 30.198  | 30.124  | 30.3168 |
| <b>OTUD7B</b>      | NaN     | NaN     | NaN     | NaN     | NaN     | 24.5043   | 24.1319 | 23.8216 | 27.3838 | 26.6543 |
| <b>OTUD6B</b>      | NaN     | NaN     | 21.7102 | NaN     | NaN     | 25.1818   | 23.6787 | 29.1847 | 29.5897 | 29.3455 |
| <b>OTUD5</b>       | NaN     | NaN     | NaN     | NaN     | NaN     | NaN       | NaN     | NaN     | NaN     | 25.5665 |
| <b>OTUB1</b>       | 23.204  | NaN     | 24.8155 | NaN     | NaN     | 31.1374   | 31.2886 | 31.9004 | 32.07   | 31.8336 |

---

(NaN), protein groups not detected.

---

**Table S2.** LFQ intensity scores for proteins other than DUBs significantly enriched in HeLa cell using 15  $\mu$ M HA-Cys(cR<sub>10</sub>)-Ub-TZ.

| Gene name   | No UV   |         |         |         |         | 365 nm UV |         |         |         |         |
|-------------|---------|---------|---------|---------|---------|-----------|---------|---------|---------|---------|
|             | 1       | 2       | 3       | 4       | 5       | 1         | 2       | 3       | 4       | 5       |
| VDAC3       | NaN     | NaN     | 24.1911 | 26.0451 | NaN     | 25.5378   | 25.6446 | 26.7551 | 27.1071 | 27.2153 |
| TXNRD1      | NaN     | NaN     | 26.4228 | 26.4205 | 24.383  | 29.5149   | 29.8737 | 31.2127 | 31.1446 | 31.2132 |
| TXNL1       | NaN     | NaN     | NaN     | NaN     | NaN     | 26.239    | 24.8414 | 26.8243 | 25.9941 | 26.359  |
| TUBG1;TUBG2 | NaN     | NaN     | NaN     | NaN     | NaN     | NaN       | NaN     | 25.9719 | 25.2844 | 25.8985 |
| RPS9        | NaN     | NaN     | 24.8518 | 29.2159 | NaN     | 28.6813   | 29.0113 | 29.5475 | 29.7339 | 29.5761 |
| RPS15A      | NaN     | NaN     | NaN     | 29.4472 | NaN     | 28.9104   | 28.9857 | 29.3549 | 29.3746 | 29.4466 |
| RPL28       | NaN     | 25.272  | 25.096  | 27.3829 | 24.1306 | 27.2031   | 27.2147 | 27.8742 | 27.6196 | 27.8021 |
| RPL24       | NaN     | NaN     | 25.5913 | 26.9917 | 22.221  | 27.4561   | 29.5249 | 28.9248 | 29.0904 | 29.1317 |
| RAP2C       | NaN     | NaN     | NaN     | NaN     | NaN     | 24.7452   | NaN     | 24.8806 | 24.8578 | 25.2572 |
| RAB1s       | NaN     | NaN     | NaN     | 28.2238 | NaN     | 27.543    | 27.0064 | 28.5305 | 28.7422 | 28.5595 |
| PYGL        | NaN     | NaN     | NaN     | 24.4705 | NaN     | 24.2626   | NaN     | 24.7085 | 26.0089 | 25.1663 |
| PSMD5       | NaN     | NaN     | NaN     | 24.4639 | NaN     | 24.7451   | 24.5933 | 25.2666 | 25.6942 | 26.2348 |
| PSMD3       | NaN     | NaN     | 24.6898 | 24.9453 | NaN     | 26.0478   | 24.6055 | 27.1184 | 26.7428 | 27.0417 |
| PSMD2       | NaN     | NaN     | 24.3679 | 26.3623 | NaN     | 27.4101   | 28.8331 | 29.6791 | 30.4561 | 29.9177 |
| PSMD12      | NaN     | NaN     | NaN     | 26.0903 | NaN     | 26.4866   | 25.1397 | 27.9649 | 28.4647 | 28.4363 |
| PSMD11      | NaN     | NaN     | 24.5586 | NaN     | NaN     | 24.9424   | 26.6761 | 27.824  | 28.751  | 28.4815 |
| PSMD1       | NaN     | NaN     | NaN     | NaN     | 22.5961 | 27.6909   | 28.2707 | 28.7738 | 28.8057 | 28.9372 |
| PSMC6       | NaN     | NaN     | NaN     | NaN     | NaN     | 24.8715   | 27.4638 | 28.8751 | 29.5989 | 29.1026 |
| PSMC5       | NaN     | NaN     | 24.2692 | 26.6947 | 23.3601 | 29.1465   | 29.2441 | 29.8786 | 29.8263 | 30.0863 |
| PSMC4       | NaN     | 22.2232 | 21.2669 | 23.1635 | NaN     | 28.2573   | 27.9877 | 28.9581 | 29.5309 | 29.3455 |
| PSMC3       | NaN     | NaN     | NaN     | 25.0519 | NaN     | 28.2949   | 28.5933 | 29.418  | 29.2574 | 29.3574 |
| PSMC2       | NaN     | NaN     | NaN     | 25.8201 | NaN     | 28.9473   | 29.3472 | 29.4719 | 29.9304 | 29.7466 |
| PSMC1       | NaN     | NaN     | NaN     | 24.3122 | NaN     | 28.2992   | 28.9927 | 28.48   | 29.63   | 29.1337 |
| PDLIM5      | NaN     | NaN     | NaN     | NaN     | NaN     | 24.0299   | 23.742  | 25.4015 | 25.3455 | 25.3096 |
| PDCD6IP     | NaN     | NaN     | NaN     | 24.6357 | 23.7052 | 24.8547   | 25.0669 | 26.5999 | 25.4366 | 25.1956 |
| PABPC1;C3   | 23.3585 | 23.9333 | 24.1752 | 26.6471 | 24.7792 | 26.5504   | 26.7457 | 27.3759 | 26.4746 | 26.4159 |
| NUMA1       | NaN     | NaN     | NaN     | 24.9626 | NaN     | 26.7693   | 27.0973 | 26.8749 | 28.1156 | 27.8927 |
| MGST1       | NaN     | NaN     | NaN     | NaN     | NaN     | 24.495    | NaN     | 25.3089 | 25.1222 | 25.2498 |
| MARS        | 23.4149 | NaN     | NaN     | 22.6214 | NaN     | 24.2382   | 26.4202 | 25.3701 | 27.4579 | 26.5003 |
| MAGT1       | NaN     | NaN     | NaN     | NaN     | NaN     | NaN       | NaN     | 23.9187 | 24.703  | 24.4729 |
| IPO5        | NaN     | NaN     | 22.8805 | NaN     | NaN     | 23.4608   | 26.397  | 26.9349 | 27.7489 | 27.1534 |
| IGKV4-1     | NaN     | NaN     | NaN     | 27.7336 | NaN     | 27.1822   | 27.6874 | 27.8236 | 28.5357 | 27.9662 |
| ERLIN2      | NaN     | NaN     | NaN     | NaN     | NaN     | NaN       | 23.4575 | 25.202  | NaN     | 25.6952 |
| EPPK1       | NaN     | NaN     | 26.492  | NaN     | 25.2328 | 26.0604   | 27.3481 | 27.8788 | 28.4958 | 27.4981 |
| EIF3B       | NaN     | NaN     | NaN     | 24.2068 | NaN     | 24.6114   | 24.3998 | 26.1814 | 27.2162 | 25.5444 |
| AUP1        | NaN     | NaN     | NaN     | NaN     | NaN     | 25.7209   | 25.7907 | 27.3528 | 27.4678 | 27.1832 |
| ATL3        | 20.9944 | NaN     | NaN     | 23.2999 | NaN     | NaN       | NaN     | 25.9572 | 27.1395 | 26.9036 |
| ATAD3A;3C   | NaN     | NaN     | 22.3204 | 28.282  | 21.7979 | 27.3405   | 27.4363 | 28.6142 | 29.049  | 28.9578 |
| AIMP1       | NaN     | NaN     | NaN     | NaN     | NaN     | 25.3229   | 26.6795 | 25.8377 | 26.2572 | 26.7655 |

(NaN), protein groups not detected.



**Table S3.** Pairwise comparison of fold difference and *P*-value ( $-\log_{10}$ ) for DUBs captured in HeLa cells at different time points following the release from G1/S phase using 15  $\mu$ M HA-Cys(cR<sub>10</sub>)-Ub-TZ.

| Gene name          | 1 h/0 h following the release from G1/S |                                 | 4 h/0 h following the release from G1/S |                                 | 4 h/1 h following the release from G1/S |                                 |
|--------------------|-----------------------------------------|---------------------------------|-----------------------------------------|---------------------------------|-----------------------------------------|---------------------------------|
|                    | fold difference                         | <i>P</i> value ( $-\log_{10}$ ) | fold difference                         | <i>P</i> value ( $-\log_{10}$ ) | fold difference                         | <i>P</i> value ( $-\log_{10}$ ) |
| <b>OTUB1</b>       | 0.88                                    | 0.18                            | 0.52                                    | 1.34                            | 0.58                                    | 1.64                            |
| <b>OTUD6B</b>      | 0.95                                    | 0.07                            | 0.54                                    | 1.23                            | 0.57                                    | 1.75                            |
| <b>OTUD7B</b>      | 1.02                                    | 0.02                            | 0.74                                    | 0.66                            | 0.73                                    | 0.71                            |
| <b>UCHL3</b>       | 0.95                                    | 0.09                            | 0.72                                    | 0.85                            | 0.75                                    | 1.48                            |
| <b>UCHL5</b>       | 0.98                                    | 0.03                            | 0.72                                    | 1.22                            | 0.73                                    | 1.29                            |
| <b>USP10</b>       | 1.23                                    | 0.21                            | 0.33                                    | 1.99                            | 0.27                                    | 1.55                            |
| <b>USP11</b>       | 1.12                                    | 0.11                            | 1.09                                    | 0.08                            | 0.97                                    | 0.03                            |
| <b>USP14</b>       | 1.85                                    | 1.08                            | 1.11                                    | 0.14                            | 0.60                                    | 0.78                            |
| <b>USP15</b>       | 1.45                                    | 0.55                            | 1.23                                    | 0.27                            | 0.85                                    | 0.65                            |
| <b>USP16</b>       | 1.11                                    | 0.09                            | 0.52                                    | 0.85                            | 0.47                                    | 1.75                            |
| <b>USP19</b>       | 4.21                                    | 1.43                            | 2.45                                    | 0.62                            | 0.58                                    | 0.61                            |
| <b>USP4</b>        | 1.01                                    | 0.00                            | 0.46                                    | 0.55                            | 0.45                                    | 0.60                            |
| <b>USP47</b>       | 1.53                                    | 0.66                            | 1.12                                    | 0.15                            | 0.73                                    | 0.42                            |
| <b>USP5</b>        | 0.97                                    | 0.08                            | 0.90                                    | 0.51                            | 0.93                                    | 0.27                            |
| <b>USP7</b>        | 1.22                                    | 0.35                            | 0.84                                    | 0.33                            | 0.69                                    | 1.08                            |
| <b>USP8</b>        | 1.10                                    | 0.15                            | 0.65                                    | 0.85                            | 0.59                                    | 1.09                            |
| <b>USP9X;USP9Y</b> | 1.81                                    | 0.70                            | 0.96                                    | 0.04                            | 0.53                                    | 1.22                            |

Note: When protein groups were not detected by MaxQuant analysis (NaN), LFQ value was imputed by Perseus for calculation of fold-difference between pulldowns (see Supplemental Methods), which is the case for USP16 not being detected in 4 h.

## Supplemental Methods

**Plasmid Construction and Gene Cloning.** The yeast Ub<sub>1-75</sub> gene was mutated using QuikChange polymerase chain reaction (PCR) to generate the humanized Ub<sub>1-75</sub> (S19P, D24E, and S28A) and used throughout this work. The generation of HA-Cys-Ub<sub>1-75</sub> is described in previous publication.<sup>[1]</sup>

**Protein Expression and Purification.** Ubiquitin was expressed and purified as described below. HA-Cys-Ub<sub>1-75</sub> plasmid was transformed into BL21(DE3) cells and cultured at 37 °C until OD<sub>600</sub> reached 0.3-0.4. The incubation temperature was decreased to 16 °C until OD<sub>600</sub> reached 0.4-0.6. Then, protein expression was induced with 1 mM IPTG. Cells were cultured for an additional 15 - 20 h at 16 °C after the induction and harvested by centrifugation at 6,000 rpm for 10 min at 4 °C. Cells expressing HA-Cys-Ub were sonicated in lysis buffer containing 20 mM Tris (pH 7.5), 200 mM NaCl, 5% glycerol and 1 mM EDTA, 1 mM PMSF, and centrifuged at 6,000 rpm. The cell free extract was incubated chitin resin (New England Biolabs, Ipswich, MA) overnight at 4 °C. After removal of unbound proteins via centrifugation (2,000 rpm at 4 °C), the resin was first washed with a high salt buffer containing 20 mM Tris (pH 7.5), 0.5 M NaCl, 5% glycerol, 1 mM EDTA, followed by a low salt buffer wash with 20 mM MES (pH 6.5), 100 mM NaCl. The washed resin was then incubated with cleavage buffer containing 20 mM MES (pH 6.5), 100 mM NaCl, 80 mM MESNA for 15 h at 4 °C. Protein was then eluted and concentrated using Amicon Ultra-15 Centrifugal Filter Units (Thermo Fisher Scientific, Waltham, MA). The purity of proteins was estimated to be 90% or greater by SDS-PAGE gel analysis with Coomassie Blue staining. Bradford assay was used to determine the concentration of the purified protein and protein sample was flash frozen and stored at -80 °C. USP2-CD, UCHL1 and UCHL3 were expressed and purified as previously described.<sup>[2]</sup>

**Mammalian Cell Culture.** HeLa cell line (ATCC CCL-2) was cultured in RPMI-1640 Medium (Thermo Fisher Scientific Inc., Waltham, MA) supplemented with 10% FBS. Cells were maintained at 37 °C and 5% CO<sub>2</sub> in a humidified incubator.

**Immunoblotting Analysis of DUB Labeling by Ubiquitin Probes.** HeLa cells were plated in Corning Costar Flat Bottom Cell Culture 6-well plates (Mediatech, Inc., Manassas, VA) at 50% confluence and allowed to adhere for 12 h in RPMI-1640 medium supplemented with 10% FBS at 37 °C and 5% CO<sub>2</sub>. Cells were treated with 15 μM of HA-Cys(cR<sub>10</sub>)-Ub-TZ for 4 h at 37°C at 5% CO<sub>2</sub> in the same medium. Post probe treatment, 0.25% trypsin, 0.1% EDTA in HBSS buffer without calcium, magnesium, and sodium bicarbonate (Mediatech, Inc., Manassas, VA) was added to cells and allowed to incubate for 3 min at room temperature. After trypsin solution was removed, cells were washed three times with cold DPBS buffer (Dulbecco's Phosphate-Buffered Salt solution) (Mediatech, Inc., Manassas, VA). Cells were then harvested and washed with cold DPBS and used immediately for the following experiments or stored at -80°C.

Cell lysate for immunoblotting was generated according to previous publication.<sup>[1]</sup> 40 µg cell lysate was incubated with 15 µM probe at 37°C for 2h. After incubation samples were quenched using a 6X gel loading dye (35 mM Tris, 10% SDS, 30% glycerol and 9.3% DTT, pH 6.8) and resolved on a 12% reducing SDS-PAGE gel followed by transfer to a PDVF membrane (Thermo Fisher Scientific Inc., Waltham, MA). The membrane was immunoblotted with an anti-HA antibody. HRP-conjugated anti-mouse antibody was used as the secondary antibody. GAPDH protein level was utilized as a loading control and detected using an anti-GAPDH antibody. HRP-conjugated anti-rabbit antibody was used as the secondary antibody for GAPDH. ECL Western blotting substrate (Thermo Fisher Scientific Inc., Waltham, MA) was used to detect the immunoblotting signal.

**Pulldown and Mass Spectrometry Analysis.** For intracellular proteome-wide protein profiling using MS-based LFQ analysis, 200 µg cell lysate generated from the HA-Cys(cR<sub>10</sub>)-Ub-TZ treated HeLa cells as described above was incubated with 100 µL anti-HA magnetic beads in RIPA buffer supplemented with 1X Complete Protease Cocktail Inhibitor at room temperature for 2 h. Unbound proteins were removed by aspiration. The remaining anti-HA magnetic beads were washed 3 times with Tris-buffered saline, 0.1% Tween-20 (TBST). The enriched proteins by HA beads were eluted with 100 µL 50 mM NaOH. Eluate was neutralized to pH 8 using 100 µL 1M NH<sub>4</sub>HCO<sub>3</sub> solution, and adjusted to have 0.1% SDS. Then the protein solution was reduced with 20 mM DTT at 60 °C water bath for 1 h. The sample was then alkylated with 40 mM iodoacetamide at room temperature for 30 min with protection from light. The alkylation reaction was quenched by adding 10 mM DTT. Then, 1.2 mL cold acetone was added to the mixture to precipitate proteins from the solution at -20 °C overnight. The mixture was centrifuged at 14,000 rpm for 10 min to collect protein pellet at the bottom of the tube. The protein pellet was then dissolved in 200 µL 100 mM NH<sub>4</sub>HCO<sub>3</sub> and digested with 2 µg of trypsin at 37 °C for 18 h. Tryptic digestion was quenched by 0.1% formic acid. Centrifugation at 13,000 g at room temperature for 10 min was used to remove residual precipitation. Digested peptide sample was desalted with C18 zip tip and lyophilized prior to LC-MS/MS analysis.

Lyophilized trypsin digested samples were dissolved in 0.1% formic acid in ddH<sub>2</sub>O prior to LC-MS/MS analysis using a nano UHPLC column (15 cm long, 75 µm inner diameter, 3 µm C18 resin, Thermo Fisher Scientific, Waltham, MA) connected to Orbitrap Q-Exactive operated in a positive polarity mode and collision induced dissociation (Thermo Fisher Scientific, Waltham, MA) with a nano-electrospray ion source. A linear gradient of 5% - 60% acetonitrile in water with 0.1% formic acid for 150 minutes was used to separate peptides at a constant flow rate of 200 nL/min. The MS system operates in a data-dependent

mode with MS/MS scan of the six most abundant peaks from a full MS scan, which was acquired between 300 to 1800 m/z with a resolution of 60,000.

MaxQuant software version 1.4.0.6 and its Label-Free Quantification (LFQ) module were used to quantify enriched proteins as described previously.<sup>[1]</sup> When protein groups were not detected by MaxQuant analysis (NaN), an imputation by Perseus (version 1.6.1.3) was used to generate LFQ values based on normal distribution of valid LFQ values for calculation of fold-difference between pulldowns. Two-sample *t*-test was performed using the default parameters in Perseus. To generate the volcano plots, the  $-\log_{10}(P\text{-value})$  and  $\log_2(\text{fold difference of LFQ values between paired samples})$  were plotted in GraphPad Prism (version 8).

**Double Thymidine and Nocodazole Synchronization of HeLa Cells.** To synchronize cells to G1/S phase, HeLa cells were seeded at approximately 40% confluency in RPMI-1640 Medium supplemented with 10% FBS. The Corning™ Costar™ Flat Bottom Cell Culture 6-well plates (Mediatech, Inc., Manassas, VA) were used. Cells were incubated at 37°C and 5% CO<sub>2</sub> for approximately 24 h. RPMI-1640 medium supplemented with 2.0 mM thymidine (MilliporeSigma Inc., Burlington, MA) was used to replace the cell culture medium and cells were incubated at 37 °C and 5% CO<sub>2</sub> for another 12 h. The medium was removed and cells were washed three times by DPBS buffer. Fresh RPMI-1640 medium was added to the cells and incubated for 12 h at 37°C and 5% CO<sub>2</sub>. This thymidine-block procedure was repeated one more time. Following this double thymidine block procedure, cells in RPMI-1640 medium supplemented with 2.0 mM thymidine were treated with HA-Cys(cR<sub>10</sub>)-Ub-TZ probe as described above.

To synchronize cells to G2/M phase, HeLa cells were seeded at approximately 60% confluency in RPMI-1640 medium using Corning™ Costar™ Flat Bottom Cell Culture 6-well plates (Mediatech, Inc., Manassas, VA). Cells were incubated at 37°C and 5% CO<sub>2</sub> for approximately 24 h. RPMI-1640 medium supplemented with 0.5 µg/mL nocodazole (MilliporeSigma Inc., Burlington, MA) was used to replace the cell culture medium and cells were incubated at 37 °C and 5% CO<sub>2</sub> for another 12 h. Cells in RPMI-1640 medium supplemented with 0.5 µg/mL nocodazole were then treated with HA-Cys(cR<sub>10</sub>)-Ub-TZ probe as described above.

**Time Dependent Pulldown Following the Release of HeLa Cells from G1/S Phase.** HeLa cells were synchronized to G1/S phase as described above. Then, HeLa cells were incubated with 15 µM HA-Cys(cR<sub>10</sub>)-Ub-TZ probe in RPMI1640 media containing 2 mM thymidine at 37 °C and 5% CO<sub>2</sub> for 4 h. Cells were then rinsed with a trypsin-EDTA solution followed by several cold DPBS wash to remove untransduced probe. For the 0 h time point treatment, the HeLa cells were irradiated immediately with 365 nm UV for 15 min in cold DPBS buffer. For the 1 and 4 h time point treatment, the HeLa cells were

incubated with fresh RPMI1640 media without thymidine for 1 h and 4 h respectively. Then the cells were rinsed with cold DPBS buffer and irradiated with 365 nm UV for 15 min in cold DPBS buffer. The HeLa cells were harvested and pulldown was carried out using anti-HA magnetic beads as described above.

### **General Information.**

Chemical reagents were purchased from Fisher, MilliporeSigma, Alfa and Acros.  $^1\text{H}$  and  $^{13}\text{C}$  NMR spectra were obtained with Bruker AV400 NMR Spectrometer with a CryoProbe. Chemical shifts are reported in  $\delta$  (ppm) units and  $^{13}\text{C}$  and  $^1\text{H}$  signals from deuterated solvents were used as references. ACQUITY UPLC H-Class/SQD2 instrument equipped with an electrospray ionization (ESI) source was used to obtain mass spectra for small molecules. Xevo G2-S QToF instrument equipped with an electrospray ionization (ESI) source was used to obtain mass spectra for proteins. 60 GF254 (Merck) silica plate was used in thin layer chromatography (TLC) analysis. Small molecule column chromatography was conducted on silica gel (230-400 mesh). For the purification of ubiquitin probes, a Jupiter C18 column (10  $\times$  250 mm, 10 micron, Phenomenex, Torrance, CA) was used at flow rate of 4 mL/min. The UV absorbance at 214 nm was used to monitor the purification process. Water (with 0.1% formic acid) and acetonitrile (with 0.1% formic acid) were used as solvent A and B respectively.

GAPDH antibody was purchased from Santa Cruz Biotechnology Inc. (Dallas, TX). Anti-HA-tag and HRP-conjugated anti-mouse antibodies were purchased from MilliporeSigma (Billerica, MA). HRP-conjugated anti-rabbit antibody was purchased from Abcam (Cambridge, MA). Anti-HA magnetic beads and trypsin protease (MS grade) were purchased from ThermoFisher Scientific (Waltham, MA).

## Experimental Procedures and Characterization Data

### Scheme S1. Synthesis of (2-(1-methyl-1H-pyrrol-2-yl)-2H-tetrazol-5-yl)methanamine (5)

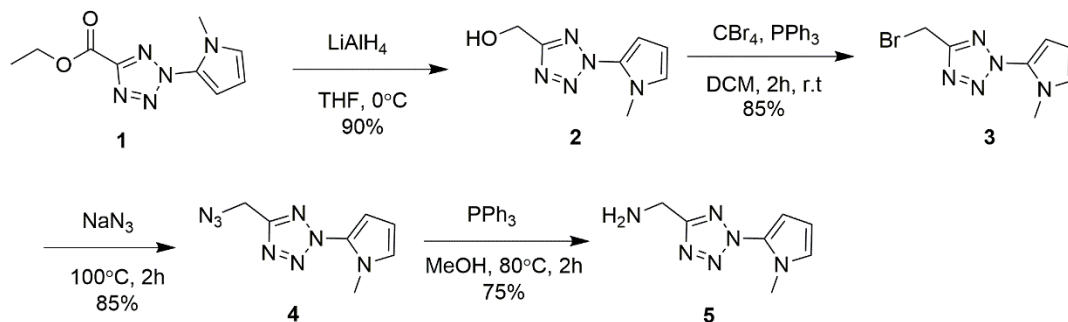

**(2-(1-methyl-1H-pyrrol-2-yl)-2H-tetrazol-5-yl)methanol (2):** Ethyl 2-(1-methyl-1H-pyrrol-2-yl)-2H-tetrazole-5-carboxylate (**1**) was generated according to previous publication.<sup>[3]</sup> **1** (2.21 g, 10 mmol) was dissolved in 50 mL dried THF, then cooled to 0 °C with ice-bath. LiAlH<sub>4</sub> (0.61 g, 16 mmol) was added in small portions during approximately 20 minutes. The mixture was stirred for another 20 minutes until the reaction was completed, as monitored by TLC. 1.5 mL water was added dropwise into the mixture to quench the reaction followed by filtration. The filtrate solution was dried with Na<sub>2</sub>SO<sub>4</sub>. The solvent was evaporated and the residue was purified by silica gel column chromatography with Hex:EtOAc (1:1) to provide (2-(1-methyl-1H-pyrrol-2-yl)-2H-tetrazol-5-yl)methanol (**1.61 g, 9 mmol, 90%**) as a colorless oil. <sup>1</sup>H NMR (CDCl<sub>3</sub>, 400 MHz) δ 6.70 (t, *J*=2.4 Hz 1H), 6.55 (m, 1H), 6.22 (m, 1H), 5.04 (s, 2H), 3.68 (s, 3H); <sup>13</sup>C NMR (CDCl<sub>3</sub>, 100 MHz): δ 165.38, 123.22, 107.64, 105.73, 56.15, 34.75. MS (ESI, positive) *m/z* calculated for C<sub>7</sub>H<sub>9</sub>N<sub>5</sub>O [M+H]<sup>+</sup> : 180.09, found: 180.09.

**5-(bromomethyl)-2-(1-methyl-1H-pyrrol-2-yl)-2H-tetrazole (3):** To a solution of (2-(1-methyl-1H-pyrrol-2-yl)-2H-tetrazol-5-yl)methanol (**2**) (1.00 g, 5.59 mmol) and PPh<sub>3</sub> (1.61 g, 6.15 mmol) in 50 mL CH<sub>2</sub>Cl<sub>2</sub>, CBr<sub>4</sub> (2.78 g, 8.39 mmol) was added under stirring. Stirring was continued for 4 h, then the solvent was evaporated and the crude residue was purified by silica gel column chromatography with Hex:EtOAc (3:1) to obtain 5-(bromomethyl)-2-(1-methyl-1H-pyrrol-2-yl)-2H-tetrazole (**1.15 g, 4.75 mmol, 85%**) as a colorless oil. <sup>1</sup>H NMR (CDCl<sub>3</sub>, 400 MHz) δ 6.71 (t, *J*=2.4 Hz 1H), 6.57 (m, 1H), 6.22 (m, 1H), 4.70 (s, 2H), 3.70 (s, 3H); <sup>13</sup>C NMR (CDCl<sub>3</sub>, 100 MHz): δ 162.94, 123.41, 107.71, 105.79, 34.89, 18.38. MS (ESI, positive) *m/z* calculated for C<sub>7</sub>H<sub>9</sub>N<sub>5</sub>O [M+H]<sup>+</sup> : 242.00, found: 242.02.

**5-(azidomethyl)-2-(1-methyl-1H-pyrrol-2-yl)-2H-tetrazole (4):** 5-(bromomethyl)-2-(1-methyl-1H-pyrrol-2-yl)-2H-tetrazole (**3**) (1.00 g, 4.13 mmol) and sodium azide (0.54 g, 8.26 mmol) were dissolved in 20 mL dry DMF and stirred at 100 °C for 2 h. After cooling to room temperature, the suspension was diluted with water (150 mL). The aqueous layer was extracted with diethyl ether (3 x 30 mL) and the combined organic layers were washed with water (30 mL) and brine (2 x 30 mL), dried with anhydrous Na<sub>2</sub>SO<sub>4</sub> and the solvent was evaporated and the crude residue was purified by silica gel column chromatography with

Hex:EtOAc (3:1) to obtain 5-(azidomethyl)-2-(1-methyl-1H-pyrrol-2-yl)-2H-tetrazole (0.72 g, 3.51 mmol, 85%) as a colorless oil. <sup>1</sup>H NMR (CDCl<sub>3</sub>, 400 MHz) δ 6.71 (t, *J*=2.4 Hz 1H), 6.58 (m, 1H), 6.23 (m, 1H), 4.69 (s, 2H), 3.70 (s, 3H); <sup>13</sup>C NMR (CDCl<sub>3</sub>, 100 MHz): δ 161.60, 123.43, 107.71, 105.82, 44.69, 34.87. MS (ESI, positive) *m/z* calculated for C<sub>7</sub>H<sub>7</sub>N<sub>9</sub> [M+H]<sup>+</sup> :205.10, found: 205.08.

**(2-(1-methyl-1H-pyrrol-2-yl)-2H-tetrazol-5-yl)methanamine (5):** To a solution of 5-(azidomethyl)-2-(1-methyl-1H-pyrrol-2-yl)-2H-tetrazole (**4**) (0.50 g, 2.45 mmol) in MeOH (25 mL) triphenylphosphine (0.96 g, 3.68 mmol) was added. The resulting mixture was stirred at 80 °C for 1h. After evaporation of the solvent, the crude residue was purified by silica gel column chromatography with DCM:MeOH:Et<sub>3</sub>N (20:1:1) to obtain (2-(1-methyl-1H-pyrrol-2-yl)-2H-tetrazol-5-yl)methanamine (0.33 g, 1.84 mmol, 75%) as a colorless oil. <sup>1</sup>H NMR (CDCl<sub>3</sub>, 400 MHz) δ 6.68 (t, *J*=2.4 Hz 1H), 6.51 (m, 1H), 6.20 (m, 1H), 4.22 (s, 2H), 3.65 (s, 3H), 2.02 (s, 2H); <sup>13</sup>C NMR (CDCl<sub>3</sub>, 100 MHz): δ 167.26, 123.07, 123.04, 107.57, 105.57, 37.44, 34.66. MS (ESI, positive) *m/z* calculated for C<sub>7</sub>H<sub>7</sub>N<sub>9</sub> [M+H]<sup>+</sup> :179.10, found: 179.17.

## Scheme S2. Generation of HA-Cys(cR<sub>10</sub>)-Ub-TZ

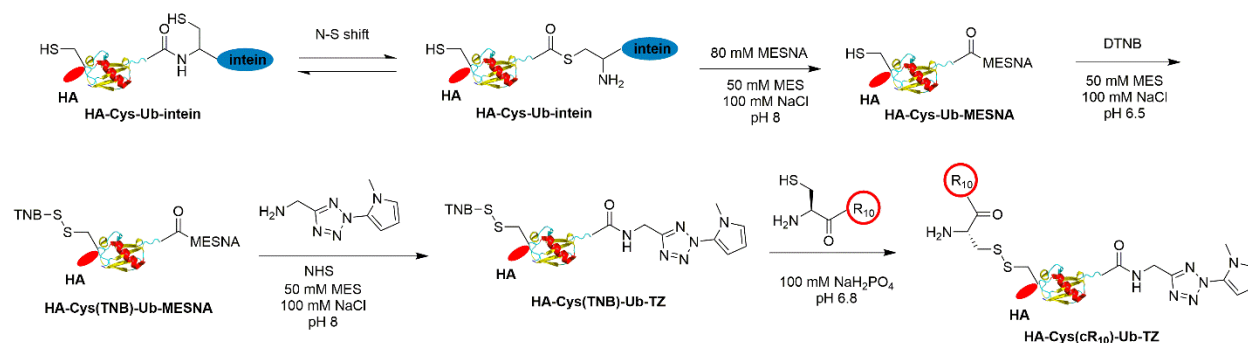

**Generation of HA-Cys(TNB)-Ub-TZ.** HA-Cys(TNB)-Ub-MESNA was generated as described in a previous publication.<sup>[1]</sup> To a solution of HA-Cys(TNB)-Ub-MESNA (10 mg/mL, 1 mL) in MES buffer (20 mM MES, 100 mM NaCl, pH 6.5), NHS (500  $\mu$ L, 2 M solution in ddH<sub>2</sub>O, 1 mmol, 1000 eq.) and **5** (500  $\mu$ L, 2 M in DMSO solution, 1 mmol, 1000 eq.) were added sequentially. The final pH of the reaction solution was approximately 8. The mixture was immediately vortexed and reacted at room temperature for 12 h. The reaction mixture was then buffer exchanged into MES buffer (20 mM MES, 100 mM NaCl, pH 6.5). The final concentration of the product was determined by Bradford assay. The molecular weight of HA-Cys(TNB)-Ub-TZ was determined by ESI-MS. (Expected mass: 10,052 Da, found mass: 10,052 Da, mass spectrum shown below).

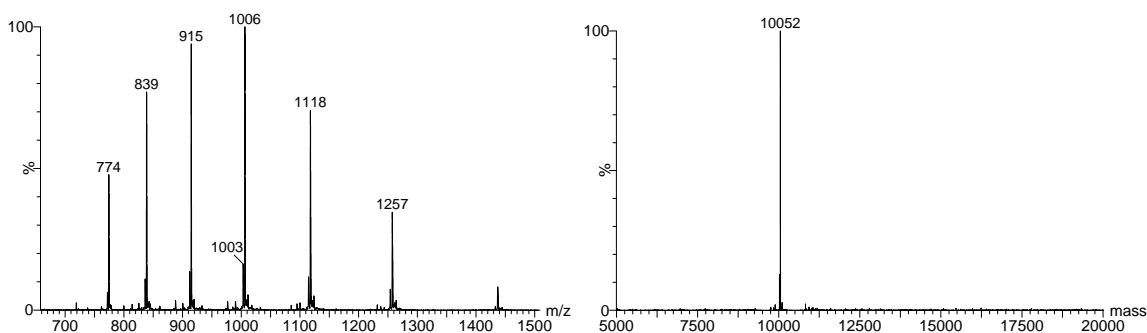

**Generation of HA-Cys(cR<sub>10</sub>)-Ub-TZ.** cR<sub>10</sub> peptide (100 mg/mL, 0.14 mL, 6.4  $\mu$ mol, 20 eq.) was added to a 50 mM NaH<sub>2</sub>PO<sub>4</sub> buffer (pH 6.8) solution containing HA-Cys(TNB)-Ub-TZ (1 mg/mL, 3.2 mL, 0.32  $\mu$ mol). The mixture was vortexed and incubated at room temperature for 2 h. The reaction mixture was then diluted with 1 mL 6 M Guanidine-HCl and concentrated to a total volume of 1.0 mL. A C18 HPLC column was used to purify the product. Solvent A is consisted of water with 0.1% formic acid, Solvent B is consisted of acetonitrile with 0.1% formic acid. Gradient in “time  $\rightarrow$  % B”: 0 min  $\rightarrow$  5%, 10 min  $\rightarrow$  30%, 70 min  $\rightarrow$  40%, 79 min  $\rightarrow$  95%. The product was eluted out at approximately 28% buffer B. Fractions containing



product were pooled and SpeedVac concentrated overnight. The pure product was dissolved in 6 M Guanidine-HCl (pH 6.0), then buffer exchanged into MES buffer (20 mM MES, 100 mM NaCl, pH 6.5) for four times. The molecular weight of HA-Cys(cR<sub>10</sub>)-Ub-TZ was determined by ESI-MS. (Expected mass: 12,063 Da, found mass: 12,062 Da, mass spectrum shown below).

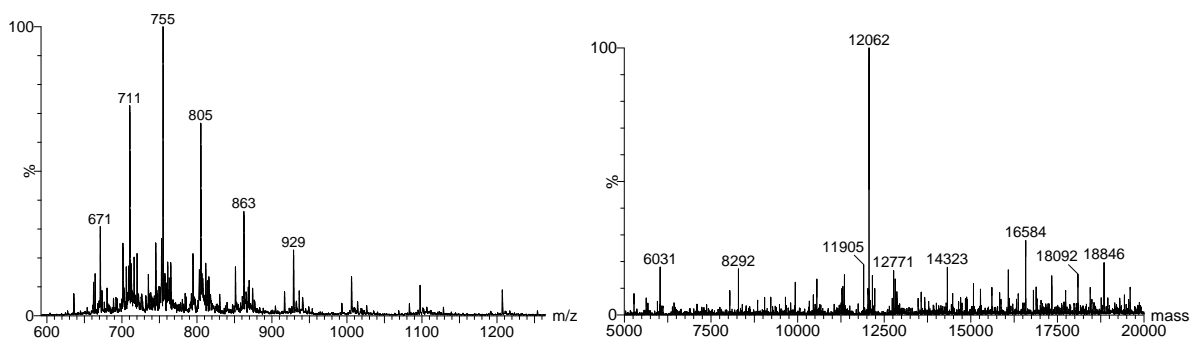

### Generation of HA-Cys-Ub-TZ.

To a solution of HA-Cys(TNB)-Ub-TZ (500  $\mu$ L, 1 mg/mL) in MES buffer (20 mM MES, 100 mM NaCl, pH 6.5), DTT (1 M, 0.1 mL) was added. The mixture was immediately vortexed and incubated at room temperature for 1 h. Following the reaction, the solution was buffer exchanged into MES buffer (20 mM MES, 100 mM NaCl, pH 6.5) for four times. The final concentration of the product was determined by Bradford assay. The molecular weight of HA-Cys-Ub-TZ was determined by ESI-MS. (Expected mass: 9,855 Da, found mass: 9,855 Da, mass spectrum shown below).

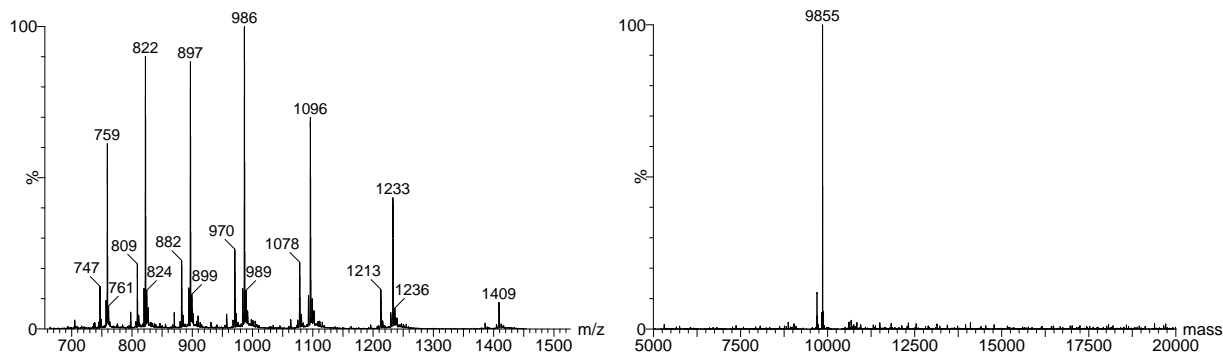

## Reference

- [1] W. Gui, C. A. Ott, K. Yang, J. S. Chung, S. Shen, Z. Zhuang, *J Am Chem Soc* **2018**, *140*, 12424-12433.
- [2] C. A. Ott, B. Baljinnyam, A. V. Zakharov, A. Jadhav, A. Simeonov, Z. Zhuang, *ACS Chem Biol* **2017**, *12*, 2399-2407.
- [3] Y. Tian, M. P. Jacinto, Y. Zeng, Z. Yu, J. Qu, W. R. Liu, Q. Lin, *J Am Chem Soc* **2017**, *139*, 6078-6081.

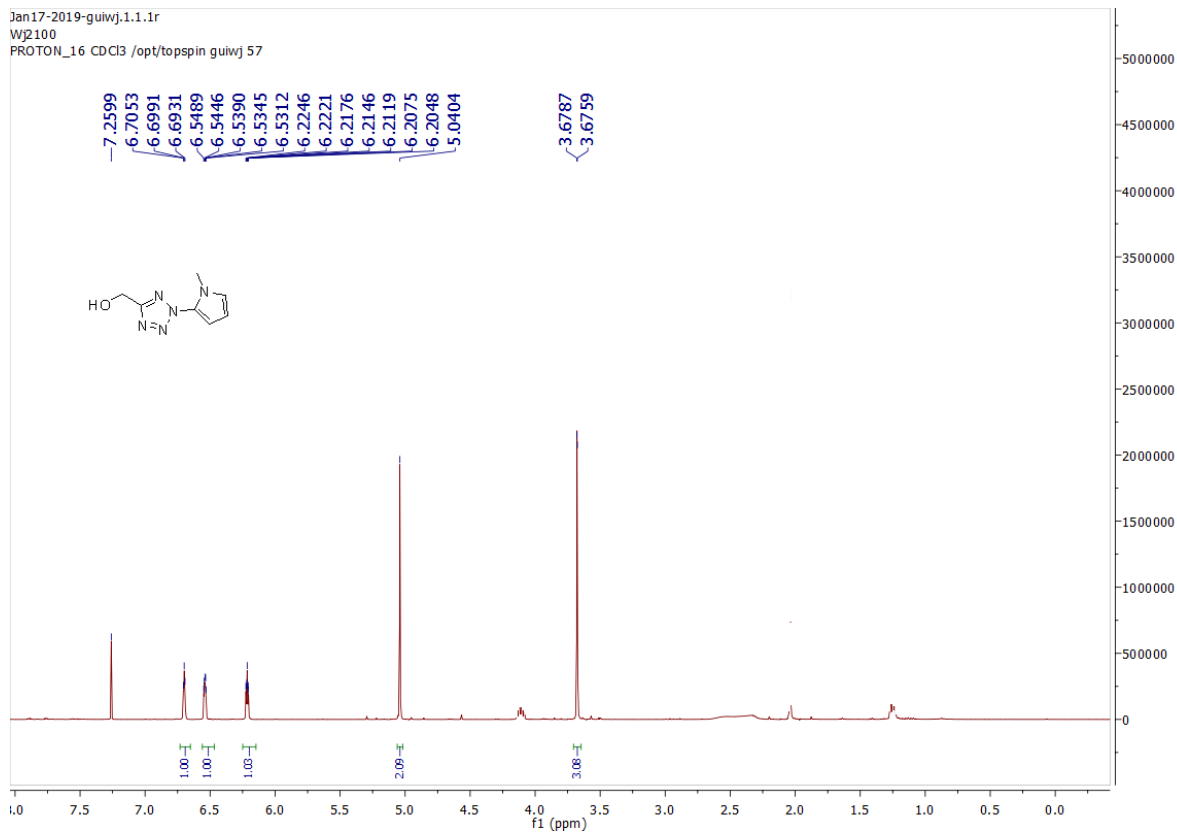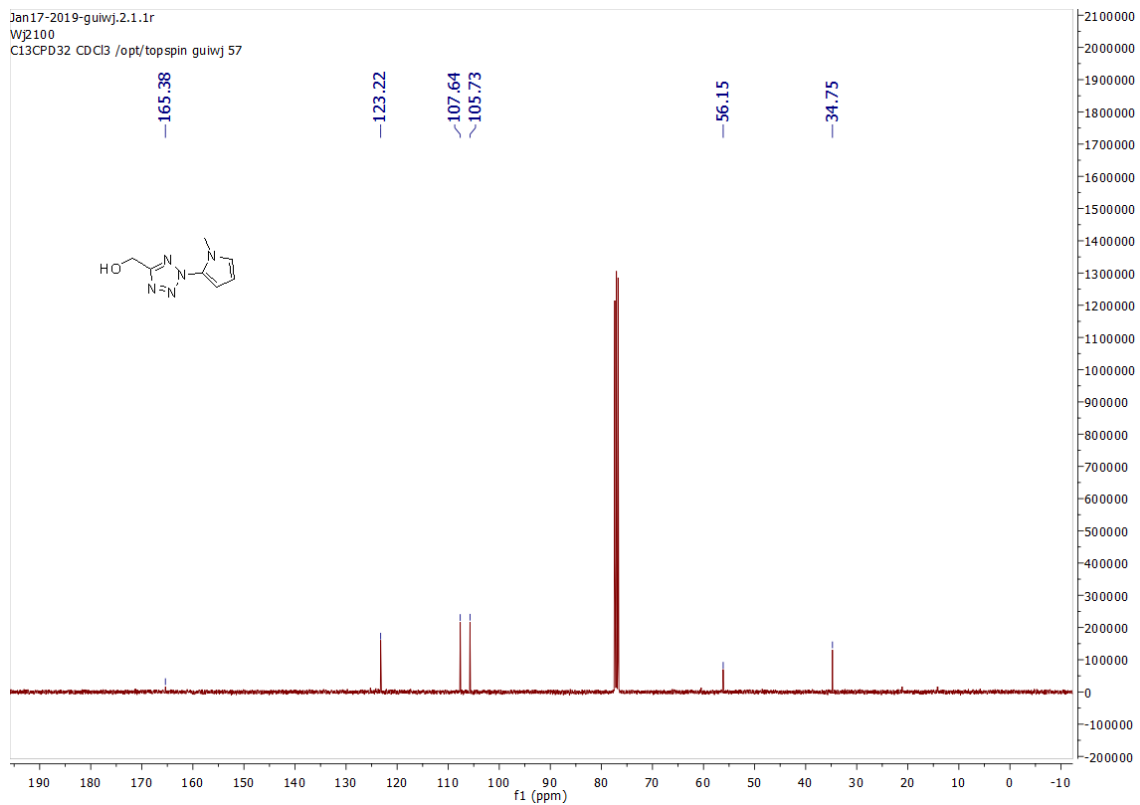

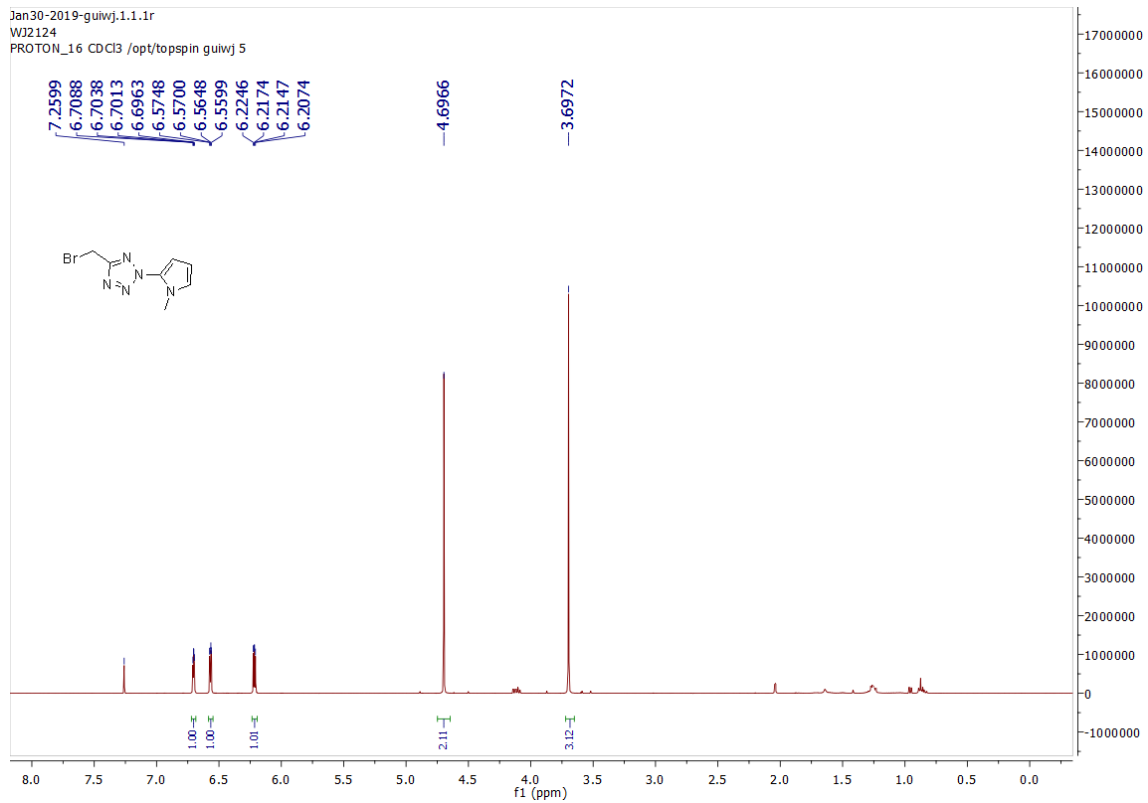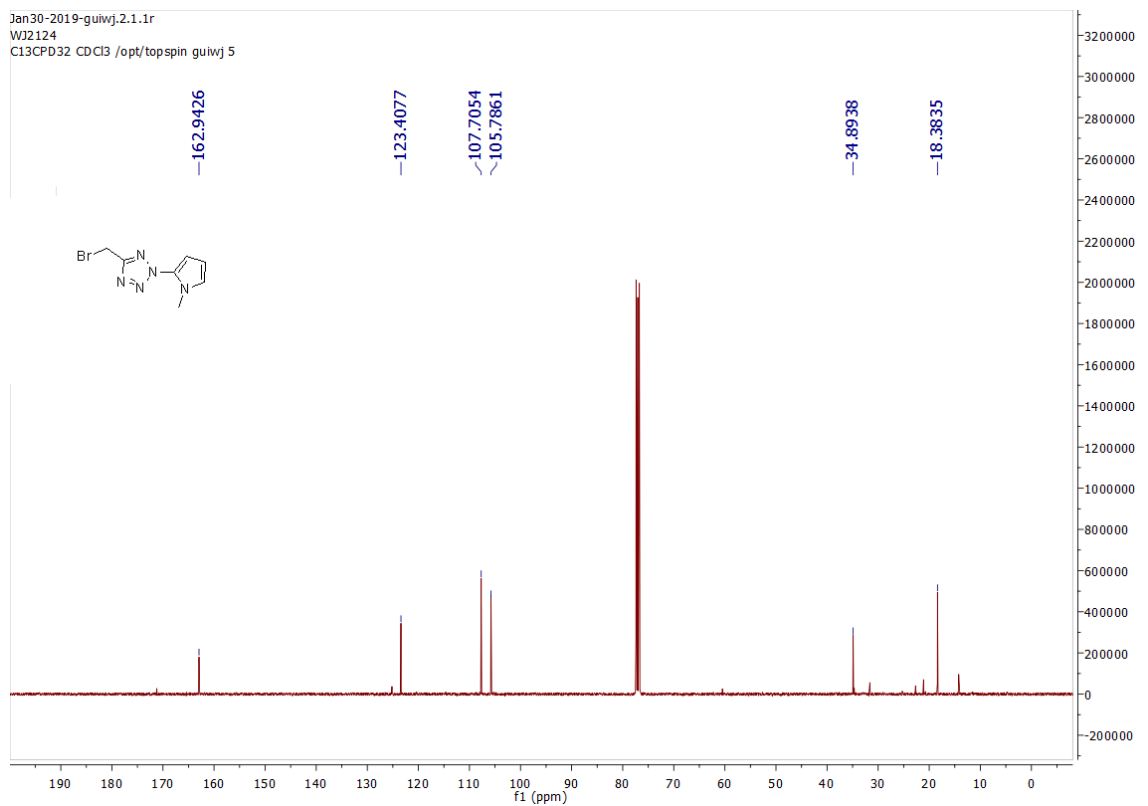

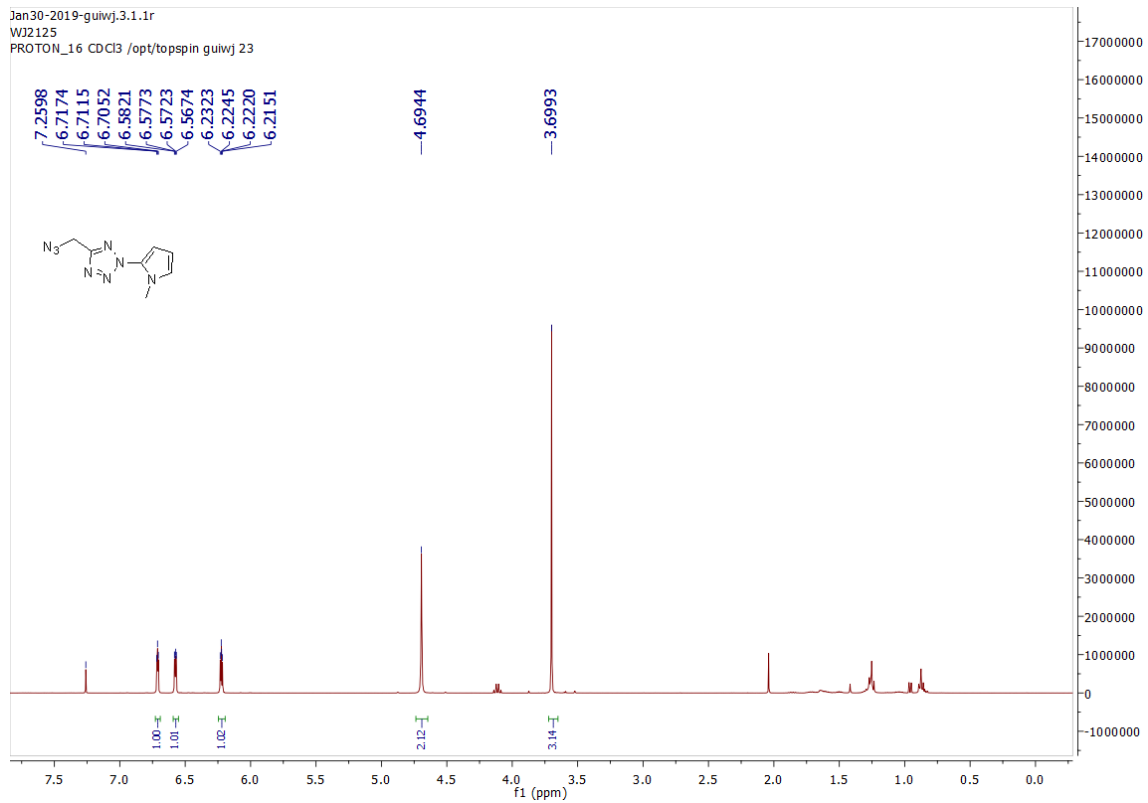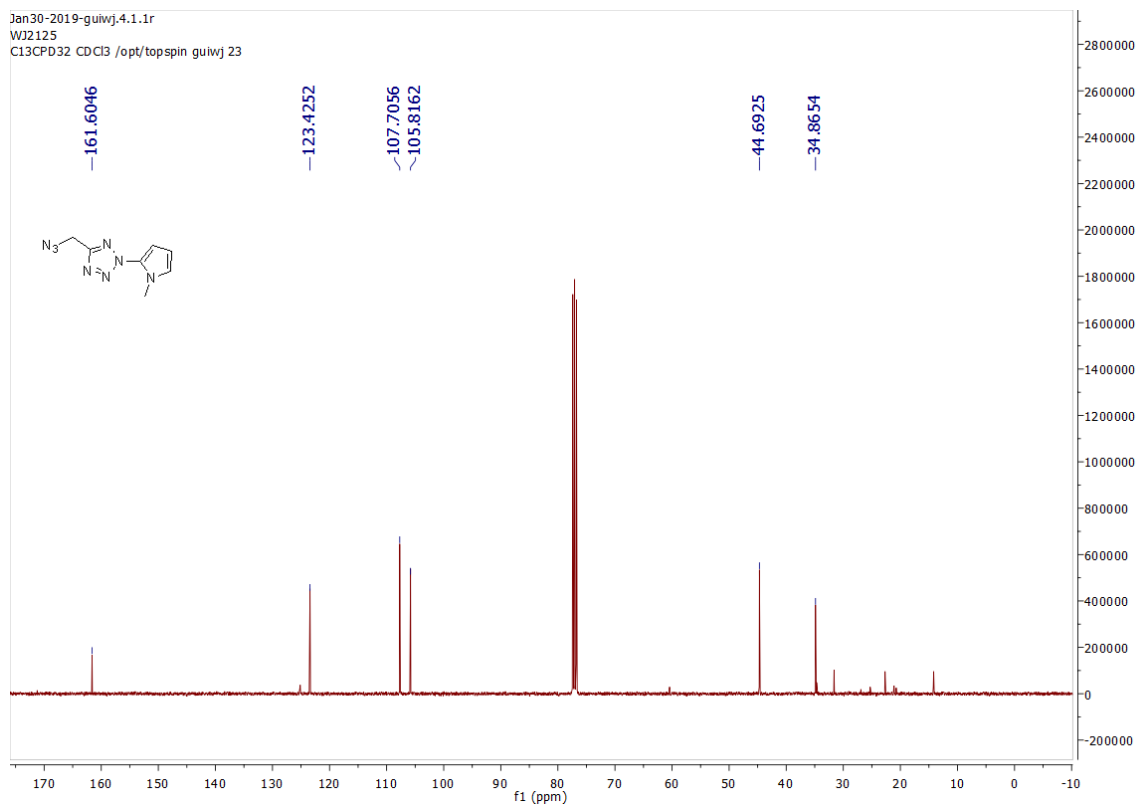

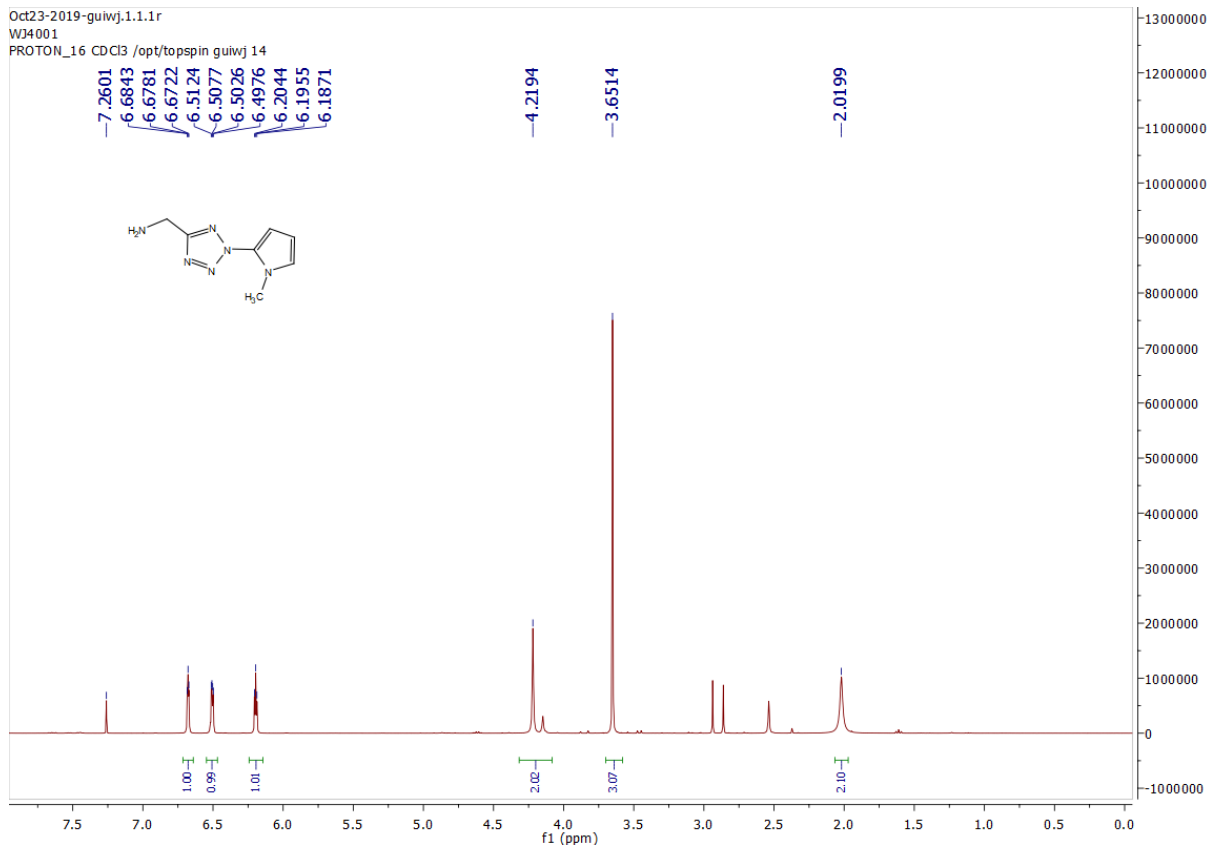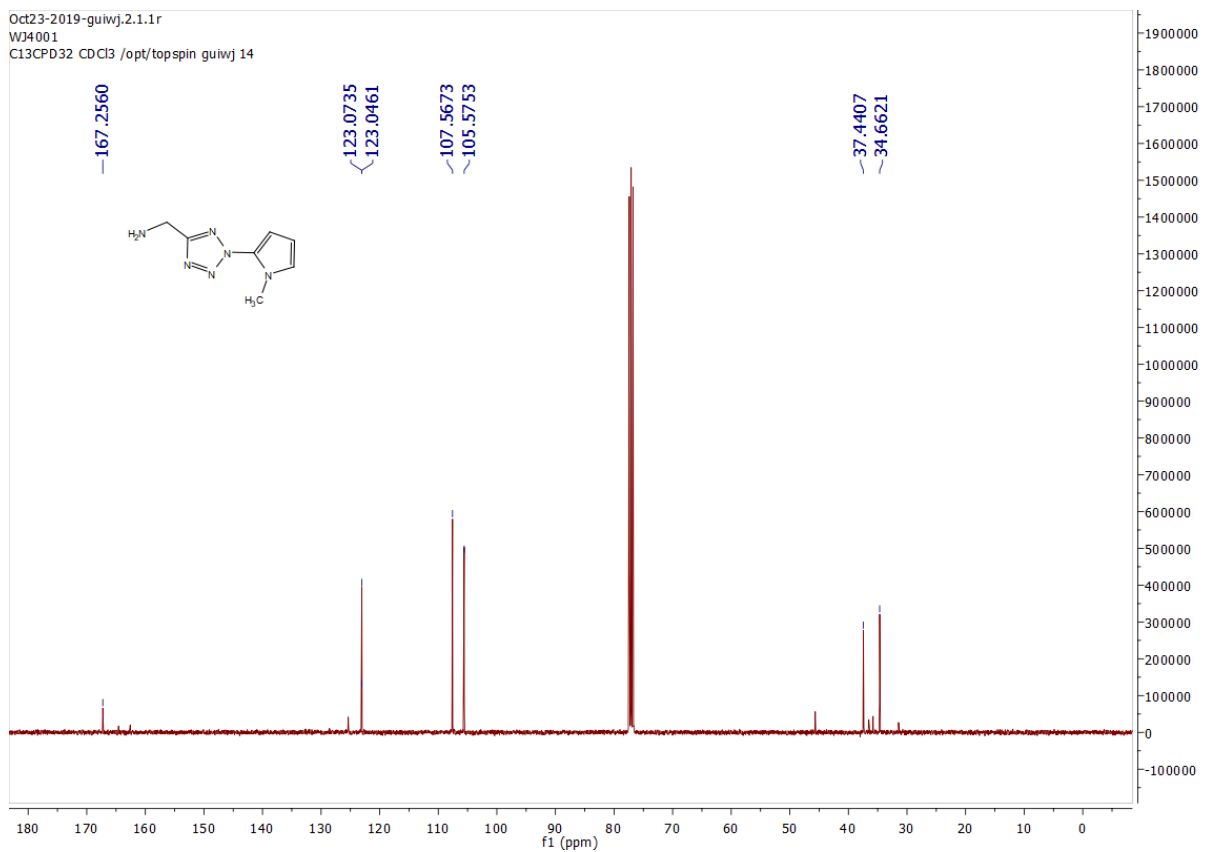

Supplement: NIHMS1672727-supplement-SI.pdf [file NIHMS1672727-supplement-SI.pdf]
